# 1 Evolution of an enzyme from a solute- 2 binding protein

3

4 Ben E. Clifton<sup>1</sup>, Joe A. Kaczmarek<sup>1</sup>, Paul D. Carr<sup>1</sup>, Monica L. Gerth<sup>2</sup>, Nobuhiko Tokuriki<sup>3</sup> &  
5 Colin J. Jackson<sup>1\*</sup>

6

7 <sup>1</sup>Research School of Chemistry, Australian National University, 137 Sullivans Creek Road,  
8 Acton, ACT 2601, Australia.

9 <sup>2</sup>Department of Biochemistry, University of Otago, 710 Cumberland Street, Dunedin 9016,  
10 New Zealand.

11 <sup>3</sup>Michael Smith Laboratories, University of British Columbia, 2185 East Mall, Vancouver,  
12 BC V6T 1Z4, Canada.

13

14 \*To whom correspondence should be addressed ([colin.jackson@anu.edu.au](mailto:colin.jackson@anu.edu.au)).

15 **Abstract**

16 Much of the functional diversity observed in modern enzyme superfamilies originates from  
17 molecular tinkering with existing enzymes<sup>1</sup>. New enzymes frequently evolve from enzymes  
18 with latent, promiscuous activities<sup>2</sup>, and often inherit key features of the ancestral enzyme,  
19 retaining conserved catalytic groups and stabilizing analogous intermediates or transition  
20 states<sup>3</sup>. While experimental evolutionary biochemistry has yielded considerable insight into  
21 the evolution of new enzymes from existing enzymes<sup>4</sup>, the emergence of catalytic activity *de*  
22 *novo* remains poorly understood. Although certain enzymes are thought to have evolved from  
23 non-catalytic proteins<sup>5-7</sup>, the mechanisms underlying these complete evolutionary transitions  
24 have not been described. Here we show how the enzyme cyclohexadienyl dehydratase (CDT)  
25 evolved from a cationic amino acid-binding protein belonging to the solute-binding protein  
26 (SBP) superfamily. Analysis of the evolutionary trajectory between reconstructed ancestors  
27 and extant proteins showed that the emergence and optimization of catalytic activity involved  
28 several distinct processes. The emergence of CDT activity was potentiated by the  
29 incorporation of a desolvated general acid into the ancestral binding site, which provided an  
30 intrinsically reactive catalytic motif, and reshaping of the ancestral binding site, which  
31 facilitated enzyme-substrate complementarity. Catalytic activity was subsequently gained *via*  
32 the introduction of hydrogen-bonding networks that positioned the catalytic residue precisely  
33 and contributed to transition state stabilization. Finally, catalytic activity was enhanced by  
34 remote substitutions that refined the active site structure and reduced sampling of non-  
35 catalytic states. Our work shows that the evolutionary processes that underlie the emergence  
36 of enzymes by natural selection in the wild are mirrored by recent examples of computational  
37 design and directed evolution of enzymes in the laboratory.

38 **Main text**

39 Solute-binding proteins (SBPs) comprise an abundant and adaptable superfamily of  
40 extracytoplasmic receptors that are mainly involved in solute transport and chemotaxis in  
41 association with bacterial ATP-binding cassette (ABC) importers and chemotactic receptors<sup>8</sup>.  
42 However, enzymes such as cyclohexadienyl dehydratase (CDT; EC 4.2.1.51, 4.2.1.91), which  
43 catalyzes the cofactor-independent Grob-type fragmentation of prephenate and L-arogenate to  
44 yield phenylpyruvate and L-phenylalanine<sup>9</sup>, have apparently evolved from this superfamily of  
45 non-catalytic proteins (**Fig. 1a and Supplementary Table 1**). The relationship between  
46 CDTs and SBPs was initially recognized based on sequence similarity between CDTs and  
47 polar amino acid-binding proteins (AABPs)<sup>5</sup>. More recently, crystal structures of CDT from  
48 *Pseudomonas aeruginosa* (PaCDT) and a putative AABP from *Wolinella succinogenes*  
49 (Ws0279, 26% sequence identity) from structural genomics projects have further supported  
50 the close evolutionary relationship between CDTs and AABPs<sup>10,11</sup>. The periplasmic binding  
51 protein-like (II) fold shared by PaCDT and Ws0279 consists of two  $\alpha/\beta$  domains connected  
52 by two flexible hinge strands, with the ligand binding site located at the interface of the two  
53 domains (**Fig. 1b**). Ws0279 has been annotated as a lysine-binding protein based on  
54 homology, which we confirmed using differential scanning fluorimetry (DSF) (**Extended**  
55 **Data Fig. 1a**).

56 To reconstruct the evolutionary history of CDT, we inferred the maximum-likelihood  
57 phylogeny of 131 homologs of Ws0279 and PaCDT, and used ancestral protein  
58 reconstruction<sup>12</sup> to infer the most likely amino acid sequence for each ancestral node in the  
59 phylogeny (**Fig. 1c and Extended Data Fig. 2**). We selected five ancestral nodes, designated  
60 AncCDT-1 to AncCDT-5, for experimental characterization based on patterns of sequence  
61 conservation in the extant sequences (**Fig. 1c**). AncCDT-1 represents the last common

62 ancestor of Ws0279 and PaCDT, while the other ancestral nodes represent intermediates in  
63 the evolution of PaCDT from AncCDT-1.

64 We experimentally characterized the five ancestral proteins, using isothermal titration  
65 calorimetry (ITC) to test for amino acid binding and genetic complementation to test for  
66 enzymatic activity; in the genetic complementation assay, expression of CDT rescues the  
67 growth of *Escherichia coli* L-phenylalanine auxotrophs that lack prephenate dehydratase  
68 encoded by the gene *pheA*<sup>9</sup>. AncCDT-1 is an amino acid-binding protein, displaying high  
69 affinity and broad specificity for cationic amino acids, including L-arginine ( $K_d$  0.32  $\mu$ M), L-  
70 ornithine (1.2  $\mu$ M), L-histidine (2.3  $\mu$ M) and L-lysine (6.7  $\mu$ M) (**Fig. 1d and Extended Data**  
71 **Fig. 1b**). Neither AncCDT-2 nor any subsequent ancestral protein exhibited binding of  
72 proteinogenic amino acids. AncCDT-3, AncCDT-4, and AncCDT-5 have sufficient CDT  
73 activity to rescue growth of *E. coli*  $\Delta$ *pheA* cells in minimal media (**Fig. 1e**). To test the  
74 phenotypic robustness of the predicted ancestral sequences to variations in the phylogenetic  
75 analysis, alternative versions of the ancestral proteins, designated AncCDT-1W to AncCDT-  
76 5W, were reconstructed using an alternative evolutionary model; genetic complementation  
77 assays using these alternative ancestral proteins gave qualitatively similar results (**Extended**  
78 **Data Figs 2b and 3a**). However, AncCDT-3W transformants exhibited faster growth than  
79 AncCDT-3 transformants; recombination of the two genes using staggered extension PCR  
80 followed by genetic selection showed that a single substitution (P188L) in AncCDT-3 was  
81 sufficient to recapitulate the higher growth rate associated with AncCDT-3W (**Extended**  
82 **Data Fig. 3b**). Spectrophotometric kinetic assays *in vitro* confirmed that AncCDT-3 and  
83 AncCDT-3(P188L), but not AncCDT-2, have prephenate dehydratase activity (**Extended**  
84 **Data Fig. 3d-h**).

85 These results indicated that the ancestral amino acid-binding activity was lost between  
86 AncCDT-1 and AncCDT-2, CDT activity was gained between AncCDT-2 and AncCDT-3,

87 and AncCDT-2 apparently had neither CDT activity nor binding affinity towards amino  
88 acids. To test whether AncCDT-2 was rendered non-functional by an error in its  
89 reconstructed sequence or had a function distinct from AncCDT-1 and AncCDT-3, we  
90 examined representatives of the previously uncharacterized evolutionary clades consisting of  
91 extant descendants of AncCDT-2 and AncCDT-3: Pu1068 from “Candidatus Pelagibacter  
92 ubique” and Ea1174 from *Exiguobacterium antarcticum* (**Fig. 1c**). Genetic complementation  
93 experiments showed that Ea1174, but not Pu1068, has CDT activity (**Extended Data Fig.**  
94 **3c**), and DSF experiments showed that Pu1068 is not an amino acid-binding protein  
95 (**Extended Data Fig. 1c**). Analysis of the genomic context of *Pu1068* and several of its  
96 orthologs revealed that these genes, like the SBP gene *Ws0279*, are adjacent to genes  
97 encoding transmembrane components of ABC importers, suggesting that *Pu1068* encodes an  
98 SBP rather than an enzyme (**Supplementary Table 2**). We attempted to identify the  
99 physiological ligands of Pu1068 and AncCDT-2 *via* crystallization of Pu1068 with co-  
100 purified ligands and DSF experiments with several hundred potential metabolites from  
101 libraries and rationally selected metabolites with plausible physiological importance for  
102 oceanic bacteria such as *Ca. P. ubique* (**Extended Data Fig. 4, Supplementary Table 3**).  
103 Although the exact physiological ligands of AncCDT-2 and Pu1068 could not be identified,  
104 we found that these proteins have some affinity for a variety of carboxylates (**Extended Data**  
105 **Fig. 4**) and some sulfonates, such as the sulfobetaine NDSB-221, which binds Pu1068 with a  
106  $K_d$  of 0.53 mM (**Extended Data Fig. 5**). Given that Pu1068 and its homologs are not widely  
107 distributed and are only found in bacteria that occupy a unique ecological niche (ocean), it is  
108 likely that their physiological role is highly specific for their environment and is most likely  
109 adapted for a relatively uncommon ligand. Regardless of the specific physiological ligands of  
110 AncCDT-2 and Pu1068, the functional properties of the various extant clades (*Ws0279* –  
111 cationic amino acid-binding protein; Pu1068 – SBP of unknown function; Ea1174 and

112 PaCDT – CDTs) accorded with those expected based on functional characterization of the  
113 ancestral proteins, supporting a likely evolutionary trajectory from a cationic amino acid-  
114 binding protein, to a carboxylic acid-binding protein, to CDT, an enzyme with carboxylic  
115 acid substrates (**Fig. 1c**).

116 To establish the molecular basis for this functional transition, we first solved the  
117 crystal structure of unliganded PaCDT. Unlike in the crystal structure of the enzyme  
118 complexed with HEPES (**Extended Data Fig. 6**), the active site of the unliganded enzyme  
119 was fully occluded from solvent and highly complementary to its cyclohexadienol substrates  
120 (**Fig. 2a, Extended Data Fig. 6d-e**). Docking of prephenate and L-arogenate into the  
121 unliganded PaCDT structure implied a binding mode in which Glu173 is positioned adjacent  
122 to the departing hydroxyl group of the substrate, suggesting that the enzyme mechanism  
123 involves general acid catalysis by Glu173 (**Fig. 2b and Extended Data Fig. 7a**). Consistent  
124 with its proposed role as a general acid, Glu173 is partially desolvated and predicted by  
125 PROPKA to be protonated at neutral pH ( $pK_a$  7.75), and the substitution E173Q abolishes  
126 prephenate dehydratase activity with minimal impact on secondary structure and  
127 thermostability (**Extended Data Fig. 7b-d**). The active site of PaCDT is pre-organized for  
128 protonation and elimination of the departing hydroxyl group of the substrate by an intricate  
129 hydrogen-bonding network extending from Glu173 (**Fig. 2c**). Other active site residues most  
130 likely contribute to stabilization of the departing carboxylate group and delocalized electrons  
131 in the developing  $\pi$  system in the transition state (**Fig. 2d**).

132 Comparison of the crystal structure of PaCDT with crystal structures of AncCDT-1,  
133 Pu1068, and AncCDT-3(P188L) revealed the contribution of historical amino acid  
134 substitutions to remodeling, functionalization, and refinement of the ancestral amino acid  
135 binding site (**Fig. 3**). Firstly, mutations that occurred between AncCDT-1 and AncCDT-2  
136 effected two significant structural changes that potentiated the emergence of catalytic

137 activity: the substitution V173E introduced a general acid that is positioned appropriately for  
138 general acid catalysis (**Fig. 3c**), while the substitutions D19T and A20G allowed for  
139 conformational change of Trp60, reshaping the ancestral binding site and facilitating steric  
140 complementarity between CDT and its substrates (**Fig. 3b**). These substitutions can be  
141 considered potentiating because the structural features associated with them are also observed  
142 in Pu1068 and were therefore initially adaptations towards binding a different ligand, rather  
143 than CDT activity (**Fig. 3d**). Indeed, each residue associated with these structural changes  
144 was reconstructed with high statistical confidence in the non-catalytic protein AncCDT-2  
145 (**Extended Data Fig. 2c**). Thus, the evolution of CDT from AABPs required an intermediate  
146 adaptation to a new binding function, which introduced amino acids that potentiated the  
147 structure for subsequent evolution of catalytic function.

148 Structural analysis indicates that functionalization of the ancestral binding site  
149 occurred by subsequent adaptive mutations, which fixated either between AncCDT-1 and  
150 AncCDT-2, or between AncCDT-2 and AncCDT-3. The substitutions Q100K, Q128N, and  
151 S133N introduced the hydrogen-bonding network that positions the catalytic group precisely  
152 and contributes to transition state stabilization through interactions with the departing  
153 hydroxyl and carboxylate groups of the substrate (**Fig. 3c**). Additionally, the substitutions  
154 Q100K and L198K likely contributed to dual specificity for  $\alpha$ -amino and  $\alpha$ -keto acid  
155 substrates (i.e., L-arogenate and prephenate) *via* electrostatic shielding of Asp170 (**Fig. 3e**).  
156 However, AncCDT-2 contains each of these four active site substitutions (except L198K,  
157 which is not itself sufficient to introduce catalytic activity) (**Fig. 3a**), implying that additional  
158 substitutions between AncCDT-2 and AncCDT-3 were required for the emergence of CDT  
159 activity. To identify these substitutions, we performed site-directed mutagenesis and three  
160 rounds of directed evolution, resulting in the isolation of an AncCDT-2 variant with only six  
161 substitutions (CDT-M5) that allowed slow growth of *E. coli* L-phenylalanine auxotrophs and

162 exhibited prephenate dehydratase activity *in vitro* (**Fig. 3f, Extended Data Figs 3h and 8**).  
163 Although three of these substitutions (T131G, A155I, L198K) are present in AncCDT-3, the  
164 other three substitutions (F25L, G99S, P102L) represent an alternative evolutionary trajectory  
165 towards higher catalytic activity. While the T131G substitution removes a steric clash  
166 between the enzyme and the departing carboxylate group of the substrate and the L198K  
167 substitution assists binding of the ketone group, the other four substitutions are located in the  
168 second or third shells of the active site and must have indirect effects on catalysis (**Fig. 3g**).  
169 The introduction of additional mutations in various combinations supported faster growth of  
170 L-phenylalanine auxotrophs (**Fig. 3f and Extended Data Fig. 8d**). These results show that  
171 there are multiple mutational pathways to higher catalytic activity *via* remote substitutions  
172 following the introduction of key active site residues, and that the evolutionary trajectory  
173 towards high catalytic activity is not strongly deterministic in this case.

174 Although AncCDT-3(P188L) has CDT activity, its second order rate constant  
175 ( $k_{cat}/K_M$ ) is ~6000-fold lower than PaCDT, despite their active sites being virtually identical  
176 (**Extended Data Figs 3h and 9**). We therefore investigated the role of structural dynamics in  
177 the evolutionary process. Upon ligand binding, SBPs undergo domain-scale open-closed  
178 conformational changes that are essential for function<sup>13</sup>, exemplified by the unliganded and  
179 arginine-bound crystal structures of AncCDT-1 (**Fig. 4a**). The open-closed conformational  
180 equilibrium of an SBP controls binding affinity<sup>14</sup> and the rate of solute transport<sup>13</sup>, suggesting  
181 that this equilibrium is subject to evolutionary selection. On the other hand, efficient enzyme  
182 catalysis depends on pre-organization of the active site; unproductive conformational  
183 sampling has been shown to constrain the catalytic efficiency of recently evolved  
184 enzymes<sup>15,16</sup>. The closed conformation of CDT is the catalytically competent conformation;  
185 the open-closed conformational change would be necessary only to the extent needed to  
186 enable substrate binding and product release from the occluded active site.



187           The unliganded SBPs AncCDT-1 and Pu1068 and the inefficient ancestral enzyme  
188 AncCDT-3(P188L), whose structures were solved in this work, crystallized in an open  
189 conformation (**Fig. 4a**). This is consistent with previous studies showing that unliganded  
190 AABPs sample closed or semi-closed conformations only transiently<sup>13,17</sup>, and with previously  
191 reported crystal structures of unliganded AABPs, of which only 1/14 crystallized in a closed  
192 conformation (**Supplementary Table 4**). In contrast, PaCDT crystallized in a closed  
193 conformation in the absence of substrate or substrate analogs in multiple, differently packed  
194 crystals, suggesting that the closed conformation of the enzyme is unusually stable for this  
195 protein fold (**Fig. 4a and Extended Data Fig. 6a**). Molecular dynamics (MD) simulations of  
196 the PaCDT trimer initialized from this structure, totaling 680 ns of simulation time, indicated  
197 that the open conformation is accessible in PaCDT, although most of the subunits remained  
198 closed throughout a 170 ns trajectory (**Fig. 4b-c, Extended Data Fig. 10**). Additional  
199 simulations, totaling 550 ns of simulation time, using a different initial structure or a different  
200 force field gave similar results (**Extended Data Fig. 10d-e**). The domain-scale  
201 conformational fluctuations that did occur in these MD simulations were characteristic of  
202 SBPs; principal component analysis showed that hinge-bending and hinge-twisting motions  
203 typical of AABPs<sup>18,19</sup> accounted for >85% of conformational variance (**Fig. 4b**). Indeed, the  
204 open structure of AncCDT-3(P188L), which provided experimental evidence for sampling of  
205 the open conformation in CDTs, resembled the simulated open conformation of PaCDT  
206 (**Extended Data Fig. 10a-c**). Thus, the characteristic domain-scale dynamics of the SBP fold  
207 are retained in CDTs and are indeed necessary for substrate/product diffusion from the  
208 occluded active site. However, the unusual stability of the closed conformation of PaCDT  
209 suggests that the conformational landscape of the enzyme has evolved between AncCDT-  
210 3(P188L) and PaCDT to minimize unproductive sampling of the non-catalytic open

211 conformation, contributing to improvements in catalytic efficiency towards the end of the  
212 evolutionary trajectory.

213 Our results suggest that the evolution of highly specialized and efficient CDTs (e.g.,  
214 PaCDT,  $k_{\text{cat}}/K_M \sim 10^6 \text{ M}^{-1} \text{ s}^{-1}$ ) from non-catalytic ancestors occurred in several distinct stages.  
215 Incorporation of the desolvated general acid Glu173 into the binding pocket of an ancestral  
216 SBP, despite initially being an adaptation for a different function, may have been sufficient  
217 for initial, promiscuous CDT activity. Indeed, the intrinsic reactivity of desolvated acidic and  
218 basic residues has been exploited similarly in enzymes that have evolved recently in response  
219 to anthropogenic substrates<sup>20</sup> and in enzymes engineered *via* single substitutions in non-  
220 catalytic proteins<sup>21</sup>. Following the introduction of a reactive general acid, optimization of  
221 enzyme-substrate complementarity and the introduction of hydrogen-bonding networks to  
222 position the catalytic residue precisely and stabilize the departing carboxylate group of the  
223 substrate appear to have occurred. Further improvements in catalytic efficiency could have  
224 been gained by second- and third-shell substitutions that refine the structure of the active site  
225 and optimize conformational sampling to favor catalytically relevant conformations. Similar  
226 mutational patterns have been documented in directed evolution experiments<sup>15,22</sup>.  
227 Additionally, adaptation of protein dynamics has been shown to occur analogously in the  
228 evolution of a binding protein from an enzyme, in which case the catalytically relevant  
229 conformation was *disfavored* by the function-switching mutation<sup>23</sup>.

230 Although some computationally designed protein structures have been made with  
231 atomic-level accuracy<sup>24</sup>, and various strategies have been developed to introduce catalytic  
232 activity into arbitrary protein scaffolds<sup>21,25,26</sup>, replicating the catalytic proficiency of natural  
233 enzymes using computational design remains a major challenge<sup>27,28</sup>. The evolutionary  
234 trajectory of CDT has striking similarities with the optimization of rationally designed  
235 enzymes by directed evolution<sup>29</sup>; catalytic activity can be initialized by computationally

236 guided grafting of a reactive catalytic motif (e.g., a desolvated carboxylate) into a protein  
237 scaffold that can accommodate the transition state for a given reaction, and directed evolution  
238 can be used to introduce additional stabilizing interactions, optimize positioning of catalytic  
239 groups, improve enzyme-transition state complementarity, and optimize conformational  
240 sampling, frequently *via* remote substitutions<sup>29,30</sup>. Thus, the strategies that have been used to  
241 improve catalytic activity in computational design and directed evolution experiments appear  
242 to mirror those that drove the emergence of an enzyme from a non-catalytic protein by  
243 natural selection.

244 **Methods**

245 **Materials.** pDOTS7 is a derivative of pQE-82L (QIAGEN) modified to enable Golden Gate  
246 cloning<sup>31</sup>, and was created by removal of the *SapI* site from pQE-82L and introduction of two  
247 reciprocal *SapI* sites following the His<sub>6</sub> tag, with the *SapI* sites separated by a 28 bp stuffer  
248 fragment. This vector was obtained from Prof. Harald Janovjak (IST Austria). The  $\Delta$ *pheA*  
249 strain of *E. coli* K-12 from the Keio collection<sup>32</sup> (strain JW2580-1) was obtained from the  
250 Coli Genetic Stock Center (Yale University, CT).

251 **Phylogenetic analysis and ancestral sequence reconstruction.** The protein sequences of  
252 113 homologs of Ws0279 and PaCDT were collected from the NCBI reference sequence  
253 database using the BLAST server. The sequences were aligned in MUSCLE<sup>33</sup>. The alignment  
254 was edited to remove N-terminal signal peptides and large insertions, and combined with a  
255 subset of a previous alignment of representative AABP sequences<sup>34</sup> by profile-profile  
256 alignment in MUSCLE, which yielded an outgroup of 271 AABP sequences. Phylogenetic  
257 trees were inferred using the maximum-likelihood (ML) method implemented in PhyML<sup>35</sup>.  
258 Evaluation of BIONJ trees reconstructed using different amino acid substitution models,  
259 using the Akaike information criterion as implemented in ProtTest<sup>36</sup>, supported the use of the  
260 WAG substitution matrix with gamma-distributed rate heterogeneity, a fixed proportion of  
261 invariant sites, and equilibrium amino acid frequencies estimated from the data  
262 (WAG+I+ $\Gamma$ +F model). Phylogenies were reconstructed in PhyML by optimization of an  
263 initial BIONJ tree using the nearest-neighbor interchange and subtree pruning and regrafting  
264 algorithms. Robustness of the resulting tree topology to the substitution model was assessed  
265 by repeating the analysis using the LG and JTT substitution matrices (LG/JTT+I+ $\Gamma$ +F  
266 models), and convergence to the ML tree was checked by repeating the analyses with ten  
267 randomized initial trees. Although the resulting trees had essentially identical topologies, the  
268 tree inferred using the LG+I+ $\Gamma$ +F model had the highest likelihood and was therefore taken

269 as the ML tree. Ancestral protein sequences were reconstructed using the empirical Bayes  
270 method implemented in PAML<sup>37</sup>. The ancestral sequences AncCDT-1 to 5 were  
271 reconstructed using the LG substitution matrix together with the ML tree inferred using the  
272 LG+I+ $\Gamma$ +F model, and the ancestral sequences AncCDT-1W to 5W were reconstructed using  
273 the WAG substitution matrix together with the tree inferred using the WAG+I+ $\Gamma$ +F model  
274 (**Extended Data Fig. 2**).

275 **Cloning and mutagenesis.** Codon-optimized synthetic genes encoding the ancestral proteins,  
276 Ws0279 (UniProt: Q7MAG0; residues 24–258), Pu1068 (UniProt: Q4FLR5; residues 19–  
277 255), Ea1174 (UniProt: K0ABP5; residues 31–268), and PaCDT (UniProt: Q01269; residues  
278 26–268) were cloned into the pDOTS7 vector using the Golden Gate method<sup>31</sup>. Site-directed  
279 mutagenesis was achieved using Gibson assembly<sup>38</sup>: gene fragments with ~30 bp overlap  
280 were synthesized by PCR using complementary primers encoding the desired mutation and  
281 assembled together with the linearized pDOTS7 vector using Gibson assembly. Successful  
282 cloning and mutagenesis was confirmed by Sanger sequencing of the vector insert.

283 **Protein expression and purification.** Proteins were generally expressed in *E. coli*  
284 (BL21)DE3 cells, except for enzyme assays, in which case they were expressed in  $\Delta pheA$   
285 cells to exclude the possibility of contamination with endogenous prephenate dehydratase.  
286 Cells were typically grown in Luria-Bertani (LB) or Terrific Broth (TB) media at 37 °C to  
287 OD<sub>600</sub> 0.8, induced with 0.5 mM  $\beta$ -D-1-isopropylthiogalactopyranoside and incubated for a  
288 further 20 h at 37 °C. Cells were pelleted and stored at -80 °C prior to protein purification.  
289 For most applications, proteins were purified under native conditions by nickel-nitrilotriacetic  
290 acid (Ni-NTA) affinity chromatography and size-exclusion chromatography (SEC). Cells  
291 were thawed, resuspended in equilibration buffer (50 mM NaH<sub>2</sub>PO<sub>4</sub>, 500 mM NaCl, 20 mM  
292 imidazole, pH 7.4), lysed by sonication, and fractionated by ultracentrifugation (24,200 $\times$ g, 1

293 hr, 4 °C). The supernatant was filtered through a 0.45 µm filter and loaded onto a 5 mL  
294 HisTrap HP column (GE Healthcare) equilibrated with equilibration buffer. The column was  
295 washed with 50 mL equilibration buffer and 25 mL wash buffer (50 mM NaH<sub>2</sub>PO<sub>4</sub>, 500 mM  
296 NaCl, 44 mM imidazole, pH 7.4), and the target protein was eluted in 25 mL elution buffer  
297 (50 mM Na<sub>2</sub>HPO<sub>4</sub>, 500 mM NaCl, 500 mM imidazole, pH 7.4). For ITC experiments,  
298 proteins were subjected to on-column refolding during the affinity chromatography step to  
299 remove endogenously bound ligands, as described previously<sup>34</sup>. Proteins were concentrated  
300 using a centrifuge filter (Amicon Ultra-15 filter unit with 10 kDa cut-off) and purified by  
301 SEC on a HiLoad 26/600 Superdex 200 column (GE Healthcare), typically eluting in SEC  
302 buffer (20 mM Na<sub>2</sub>HPO<sub>4</sub>, 150 mM NaCl, pH 7.4). Protein purity was confirmed by SDS-  
303 PAGE, and protein concentrations were measured spectrophotometrically using molar  
304 absorption coefficients calculated in ProtParam (<http://expasy.org/tools/protparam.html>).

305 **Analytical size-exclusion chromatography.** The size-exclusion column (HiLoad 26/600  
306 Superdex 200, GE Healthcare) was calibrated using a set of standard proteins (Gel Filtration  
307 HMW Calibration Kit, GE Healthcare) in SEC buffer. The partition coefficient ( $K_{av}$ ) of each  
308 protein was calculated using the equation  $K_{av} = (v_e - v_o)/(v_c - v_o)$ , where  $v_e$  is the elution  
309 volume,  $v_o$  is the column void volume, and  $v_c$  is the geometric column volume, and used to  
310 construct a calibration curve of  $K_{av}$  versus log(molecular mass).

311 **Differential scanning fluorimetry.** Differential scanning fluorimetry (DSF) experiments to  
312 test Ws0279, AncCDT-1, Pu1068, and AncCDT-2 for binding of amino acids and other  
313 metabolites were performed using a ViiA 7 (Thermo Scientific) or 7900HT Fast (Applied  
314 Biosystems) real-time PCR instrument. Reaction mixtures contained 5 µM protein in DSF  
315 buffer (50 mM Na<sub>2</sub>HPO<sub>4</sub>, 150 mM NaCl, pH 7.6), 5× SYPRO orange dye (Sigma-Aldrich)  
316 and ligand (1 mM or 10 mM for amino acids, ≥10 mM for other metabolites) in a total

317 volume of 20  $\mu\text{L}$ , and were dispensed onto a 384-well PCR plate, at least in triplicate. At  
318 least eight replicates of ligand-free control were also included on each plate. Fluorescence  
319 intensities were monitored continuously as the samples were heated from 20  $^{\circ}\text{C}$  to 99  $^{\circ}\text{C}$  at a  
320 rate of 0.05  $^{\circ}\text{C}/\text{s}$ , with excitation at 580 nm and emission measured at 623 nm. Melting  
321 temperatures ( $T_{\text{M}}$ ) were determined by fitting the data to a Boltzmann function,  $F = AT + B +$   
322  $(CT + D)/(1 + \exp((T_{\text{M}} - T)/E))$ , where  $F$  is fluorescence and  $T$  is temperature. The parameters  
323  $A$  and  $C$ , accounting for the slopes of the pre- and post-transition baselines, were fixed at zero  
324 if possible.

325 Pu1068, AncCDT-1, and AncCDT-2 were also screened against a subset of Biolog Phenotype  
326 Microarray (PM) plates (Biolog, Hayward, CA, USA), as described previously<sup>39</sup>. Libraries of  
327 biologically relevant potential ligands were generated by dissolving each compound in 50  $\mu\text{L}$   
328 water, resulting in concentrations of approximately 10–20 mM in the assay (the exact  
329 concentrations vary from well to well, and are not released by the manufacturer). Plates  
330 PM1–PM5 contain single concentrations of each compound, while plate PM9 contains a  
331 series of concentrations of each compound. Fluorescence intensities were measured on a  
332 Lightcycler 480 real-time PCR instrument (Roche Diagnostics). Initial hits were further  
333 tested using known concentrations (0–600 mM) of each potential ligand to confirm binding.  
334 An additional in-house screen consisted of a subset of the Solubility and Stability Screen  
335 (Hampton Research), which was tested by the CSIRO Collaborative Crystallisation Centre  
336 (<http://www.csiro.au/C3>), Melbourne, Australia. For this screen, the reaction mixtures  
337 contained 0.3  $\mu\text{g}$  Pu1068, 3.75 $\times$  SYPRO orange and 5  $\mu\text{L}$  ligand in a total volume of 20  $\mu\text{L}$ ,  
338 in a 96-well plate format; each ligand was tested at three concentrations and three replicates  
339 of a ligand-free control were also included. Fluorescence intensities were measured on a  
340 BioRad CFX384 real-time PCR instrument with excitation at 490 nm and emission at 570  
341 nm. The temperature was ramped from 20  $^{\circ}\text{C}$  to 100  $^{\circ}\text{C}$  at a rate of 0.05  $^{\circ}\text{C}/\text{s}$ , and the

342 fluorescence intensity was measured at 0.5 °C intervals. Melting temperatures were taken as  
343 the temperature at the minimum of the first derivative of the melt curve, which was  
344 determined by fitting the data to a quadratic function in the vicinity of the melting  
345 temperature using GraphPad Prism 7 software.

346 **Isothermal titration calorimetry.** ITC experiments were performed using a Nano-ITC low-  
347 volume calorimeter (TA Instruments); details of instrument calibration have been described  
348 previously<sup>34</sup>. ITC experiments were performed at 25 °C with stirring at 200 rpm. Protein and  
349 ligand solutions were prepared in matched SEC buffer and degassed before use. Amino acid  
350 solutions were prepared volumetrically from commercial samples (Sigma-Aldrich, Alfa  
351 Aesar) with stated purity  $\geq 98\%$ . Ancestral proteins were tested for binding of proteinogenic  
352 amino acids *via* screening experiments in which 45  $\mu\text{L}$  of 0.844 mM ligand was injected  
353 continuously into 164  $\mu\text{L}$  of 50  $\mu\text{M}$  protein over 300 s. In some cases, ligands were tested in  
354 mixtures of structurally related amino acids. For quantitative titrations, 100  $\mu\text{M}$  protein was  
355 generally titrated with  $1 \times 1 \mu\text{L}$ , then  $28 \times 1.6 \mu\text{L}$  injections of 0.69 mM ligand at 300 s  
356 intervals. The background heat was estimated as the average heat associated with each  
357 injection in a control titration of ligand into buffer, and subtracted from each protein-ligand  
358 titration. Association constants ( $K_a$ ) were determined by fitting the integrated heat data to the  
359 independent binding sites model in NanoAnalyze software (TA Instruments).

360 **Genetic complementation.** *E. coli* strain JW2580-1 ( $\Delta\text{pheA}$ ) cells were transformed with the  
361 appropriate plasmid by electroporation, plated on LB agar supplemented with 100 mg/L  
362 ampicillin (LBA agar), and incubated at 37 °C overnight. Single colonies were used to  
363 inoculate 20 mL M9 minimal media supplemented with L-tyrosine, ampicillin and IPTG  
364 (M9-F; per L: 6 g  $\text{Na}_2\text{HPO}_4$ , 3 g  $\text{KH}_2\text{PO}_4$ , 0.5 g NaCl, 1 g  $\text{NH}_4\text{Cl}$ , 20 mL 20% (w/v) glucose,  
365 2 mL 1 M  $\text{MgCl}_2$ , 0.1 mL 1 M  $\text{CaCl}_2$ , 2 mL 2.5 mg/mL L-tyrosine, 1 mL 100 mg/mL



366 ampicillin, 0.2 mL 1 M IPTG). The cultures were incubated at 37 °C with shaking at 180  
367 rpm, and OD<sub>600</sub> was measured periodically. We confirmed that the observed differences in  
368 growth rates could not be explained by differences in protein expression by culturing each  
369 clone in M9–F media supplemented with 20 µg/mL L-phenylalanine (M9+F media) and  
370 assessing protein expression by SDS-PAGE of the soluble fraction of the crude cell lysate  
371 from each culture.

372 **Preparation of sodium prephenate.** Sodium prephenate was prepared from barium  
373 chorismate (Sigma, 60 – 80% purity). Barium chorismate (40 mM in H<sub>2</sub>O) was mixed with  
374 an equimolar amount of 1 M Na<sub>2</sub>SO<sub>4</sub>. An equal volume of 100 mM Na<sub>2</sub>HPO<sub>4</sub> (pH 8.0) was  
375 added to the mixture, and the BaSO<sub>4</sub> precipitate was removed by centrifugation. Sodium  
376 prephenate was obtained by heating the resulting sodium chorismate solution at 70 °C for 1  
377 hr<sup>40</sup>. Aliquots were stored at -80 °C. The concentration of prephenate was measured by  
378 quantitative conversion of prephenate to phenylpyruvate under acidic conditions (0.5 M HCl,  
379 15 min, 25 °C) and spectrophotometric determination of phenylpyruvate concentration, as  
380 described previously<sup>41</sup>.

381 **Prephenate dehydratase assay.** Prephenate dehydratase activity was determined by  
382 spectrophotometric measurement of phenylpyruvate formation, as described previously<sup>41</sup>.  
383 Protein solutions were prepared in 20 mM Na<sub>2</sub>HPO<sub>4</sub>, 150 mM NaCl (pH 7.4), and prephenate  
384 solutions were prepared in 50 mM Na<sub>2</sub>HPO<sub>4</sub> (pH 8.0). After equilibration at room  
385 temperature for 5 min, the reaction was initiated by mixing equal volumes of protein and  
386 substrate solutions. Aliquots (50 µL or 100 µL) were regularly removed from the reaction  
387 mixture and quenched by addition of an equal volume of 2 M NaOH. Absorbance at 320 nm  
388 was measured using an Epoch Microplate Spectrophotometer (BioTek), and phenylpyruvate  
389 concentrations were determined assuming a molar extinction coefficient of 17,500 M<sup>-1</sup> cm<sup>-1</sup>.  
390 Reaction times and enzyme concentrations were adjusted to ensure <20% conversion of

391 prephenate to phenylpyruvate. The rate of non-enzymatic turnover was subtracted from the  
392 observed rate of enzyme-catalyzed turnover.

393 **Circular dichroism spectroscopy.** Circular dichroism (CD) experiments were performed  
394 using a Chirascan spectropolarimeter (Applied Photophysics) with a 1-mm path length quartz  
395 cuvette. Proteins were diluted to 0.3 mg/mL in water (for recording CD spectra) or SEC  
396 buffer (for thermal denaturation experiments) and degassed prior to measurements. CD  
397 spectra were recorded at 20 °C between 190 nm and 260 nm, with a bandwidth of 0.5 nm and  
398 a scan rate of 3 s per point, with adaptive sampling. For thermal denaturation experiments,  
399 CD was monitored at 222 nm over a temperature range of 20 °C to 90 °C, heating at 1 °C  
400 min<sup>-1</sup>.  $T_M$  values were determined by fitting the data to a two-state model:

$$y_{obs} = \frac{y_n + m_n T + (y_u + m_u T) \exp\left(\frac{\Delta H_{vH}}{R} \left(\frac{1}{T} - \frac{1}{T_M}\right)\right)}{1 + \exp\left(\frac{\Delta H_{vH}}{R} \left(\frac{1}{T} - \frac{1}{T_M}\right)\right)}$$

401 where  $y_{obs}$  is ellipticity at 222 nm,  $y_n$ ,  $m_n$ ,  $y_u$ , and  $m_u$  describe the pre-transition and post-  
402 transition baselines,  $T$  is temperature,  $R$  is the gas constant, and  $\Delta H_{vH}$  is the apparent van't  
403 Hoff enthalpy of unfolding.

404 **Crystallization and structure determination.** Crystal structures of AncCDT-1 (complexed  
405 with L-arginine), Pu1068 (unliganded), AncCDT-3(P188L), and PaCDT were solved and  
406 refined at resolutions between 1.6 Å and 2.6 Å. An additional low-resolution structure of  
407 PaCDT (3.1 Å) shows an alternate crystal packing arrangement, and a low-resolution  
408 structure of unliganded AncCDT-1 (3.4 Å) illustrates the domain-scale conformational  
409 change resulting from ligand binding. Pu1068 was also co-crystallized with NDSB-221 ((3-  
410 (1-methylpiperidinium-1-yl)propane-1-sulfonate); this low-affinity ligand was identified by

411 DSF and confirmed by fluorescence spectroscopy to bind with a  $K_d$  of 0.53 mM (**Extended**  
412 **Data Fig. 5**).

413 AncCDT-1, AncCDT-3(P188L), Pu1068, and PaCDT were crystallized using the  
414 vapor diffusion method at 18 °C. Crystals were cryoprotected and flash frozen in a nitrogen  
415 stream at 100 K. Diffraction data were collected at 100 K on the MX1 or MX2 beamline of  
416 the Australian Synchrotron<sup>42</sup>. The data were indexed and integrated in iMOSFLM<sup>43</sup> or  
417 XDS<sup>44</sup>, and scaled in Aimless<sup>45</sup>. Structures were solved by molecular replacement in Phaser<sup>46</sup>  
418 and refined by real space refinement in Coot<sup>47</sup> and reciprocal space refinement in  
419 REFMAC5<sup>48</sup> and/or PHENIX<sup>49</sup>. Full details of crystallization and structure determination for  
420 each protein are given in **Supplementary Tables 5–8**. Data collection and refinement  
421 statistics are given in **Supplementary Tables 9–12**.

422 **Computational docking.** The *apo*-PaCDT structure (PDB: 5HPQ) was prepared for  
423 computational docking in Maestro (Schrödinger). Missing side chains were rebuilt. Glu173  
424 was protonated, and other residues were assigned the appropriate protonation state at pH 7.0.  
425 Asn, Gln, and His side-chains were flipped, and Ser, Thr, Tyr, and water hydroxyl groups  
426 were reoriented to optimize hydrogen bonding networks. The structure was energy-  
427 minimized under the OPLS3 force field, with heavy atoms restrained within 0.3 Å of their  
428 initial position. Water and acetate molecules were removed from the structure after energy  
429 minimization. The structures of the PaCDT/prephenate and PaCDT/L-arogenate complexes  
430 were modeled by computational docking in Glide (Schrödinger) using the standard precision  
431 mode with default parameters for docking and scoring. The resulting complexes were energy  
432 minimized using the OPLS3 force field. In their respective highest scoring poses, L-arogenate  
433 and prephenate adopted the expected orientation, with the  $\alpha$ -amino acid and  $\alpha$ -keto acid  
434 moieties binding at the conserved structural motif that recognizes the same functional groups  
435 in AABPs.

436 **Staggered extension process.** AncCDT-3 and AncCDT-3W were recombined using the  
437 staggered extension process (StEP) following a literature protocol<sup>50</sup>. The StEP reaction  
438 mixture contained 5  $\mu$ L 10 $\times$  *Taq* buffer, 1.5 mM MgCl<sub>2</sub>, 0.2 mM each dNTP, 75 fmol each  
439 template plasmid, 30 pmol each primer, and 2.5 U *Taq* polymerase (New England Biolabs) in  
440 a total volume of 50  $\mu$ L. The primers used in the reaction were the 5' flanking primer P7XF  
441 and the 3' flanking primer P7XR (**Supplementary Table 13**), which amplify ~100 bp on  
442 either side of the *SapI* site of the pDOTS7 vector. The thermocycling program consisted of 80  
443 cycles of (i) a denaturation step for 30 s at 95 °C; and (ii) an annealing/extension step for 5 s  
444 at 52 °C. 2  $\mu$ L of the resulting PCR product was incubated with 10 U *DpnI* (Thermo  
445 Scientific) in a reaction volume of 10  $\mu$ L at 37 °C for 1 hr to digest the parental plasmid  
446 DNA. 5  $\mu$ L of the *DpnI*-digested StEP product was then amplified in a nested PCR reaction  
447 using *Taq* polymerase, in a total volume of 100  $\mu$ L. The primers used for the nested PCR  
448 reaction, P7NF and P7NR (**Supplementary Table 13**), target the *EcoRI* site on the 5' strand  
449 and the *HindIII* site on the 3' strand of the pDOTS7 vector, respectively. The nested PCR  
450 product was run on a 1% agarose gel and purified by gel extraction.

451 **Incorporation of synthetic oligonucleotides via gene reassembly.** Incorporation of  
452 synthetic oligonucleotides *via* gene reassembly (ISOR) was achieved following literature  
453 protocols<sup>51,52</sup>. The template gene was amplified by PCR using Phusion Hot Start II  
454 Polymerase (Thermo Scientific) using the primers P7XF and P7XR (**Supplementary Table**  
455 **13**). The purified PCR product was digested with DNase I (New England Biolabs) in a  
456 reaction mixture containing 100 mM TRIS pH 7.5, 10 mM MnCl<sub>2</sub>, 4  $\mu$ g PCR product and 0.3  
457 U DNase I in a total volume of 40  $\mu$ L. The reaction mixture was incubated at 37 °C for 1 – 2  
458 min and quenched by the addition of 20  $\mu$ L 0.1 M EDTA pH 8.0 pre-incubated at 80 °C,  
459 followed by heat inactivation at 80 °C for 15 min. The digested PCR product was run on a

460 2% agarose gel, and fragments 50 – 250 bp in size were excised from the gel and purified  
461 using the Wizard SV Gel and PCR Clean-Up System (Promega). The fragments were  
462 reassembled using *Taq* polymerase: each reaction contained 40 ng gene fragments, 2  $\mu$ L 10 $\times$   
463 buffer, 0.2 mM dNTPs, 1.25 U *Taq* polymerase and varied concentrations of equimolar  
464 mutagenic oligonucleotides (5 – 800 nM total concentration) in a volume of 20  $\mu$ L (see  
465 **Supplementary Table 13** for a list of oligonucleotides included in each round). The  
466 thermocycling protocol consisted of (i) an initial denaturation step at 95 °C for 2 min; (ii) 40  
467 cycles of a denaturation step at 95 °C for 30 s, then 13 hybridization steps from 65 °C to 41  
468 °C in 2 °C steps, each for 90 s (total 13.5 min), then an extension step at 72 °C for 1 min; and  
469 (iii) a final extension step at 72 °C for 7 min. 0.5  $\mu$ L of the unpurified assembly reaction  
470 mixture was amplified in a 50  $\mu$ L nested PCR reaction using *Taq* polymerase and the primers  
471 P7NF and P7NR (**Supplementary Table 13**). The nested PCR product was run on a 1%  
472 agarose gel and purified by gel extraction.

473 **Library creation and selection.** Purified PCR products (0.5  $\mu$ g) from StEP or ISOR  
474 reactions were digested with 2.5  $\mu$ L each of *Hind*III FD and *Eco*RI FD (Thermo Scientific) in  
475 a 50  $\mu$ L reaction at 37 °C for 30 min. The reaction mixture was purified immediately using a  
476 PCR purification kit. The pDOTS7 vector containing the AncCDT-2 insert (2.5  $\mu$ g) was  
477 digested using 2.5  $\mu$ L each of *Hind*III FD, *Eco*RI FD, and *Pst*I FD (which cuts within the  
478 AncCDT-2 insert) in a 50  $\mu$ L reaction at 37 °C for 30 min. The digested vector was purified  
479 immediately using a PCR purification kit, then run on a 1% agarose gel and purified by gel  
480 extraction. Ligation reaction mixtures contained 100 ng pDOTS7 vector, a 3-fold molar  
481 excess of insert, 2  $\mu$ L 10 $\times$  T4 DNA ligase buffer, and 5 U T4 DNA ligase (Thermo  
482 Scientific) in a volume of 20  $\mu$ L, and were incubated at room temperature for 1 hr. Following  
483 purification of the ligation reaction mixture using a PCR purification kit, electrocompetent *E.*

484 *coli* strain JW2580-1 ( $\Delta pheA$ ) cells were transformed with 1  $\mu$ L ligation product by  
485 electroporation and plated on LBA agar. Following overnight incubation of the plates at 37  
486  $^{\circ}$ C, colonies were scraped into LB media, then resuspended in 20 mL fresh LBA media. 100  
487  $\mu$ L of the resulting cell suspension was used to inoculate 20 mL fresh LBA media, which was  
488 then incubated at 37  $^{\circ}$ C until the OD<sub>600</sub> reached  $\sim$ 0.5. A 1 mL aliquot of the culture was  
489 washed twice with 1 mL M9 salts (6 g/L Na<sub>2</sub>HPO<sub>4</sub>, 3 g/L KH<sub>2</sub>PO<sub>4</sub>, 1 g/L NH<sub>4</sub>Cl, 0.5 g/L  
490 NaCl), and resuspended in 1 mL M9 salts. Serial dilutions of the cell suspension were made  
491 in M9 salts, plated on M9–F agar, and incubated at 37  $^{\circ}$ C. The resulting colonies were  
492 streaked onto LBA agar, and their plasmid DNA was amplified by PCR using the sequencing  
493 primers P7SF and P7SR (**Supplementary Table 13**). The resulting PCR products were  
494 sequenced by GENEWIZ (South Plainfield, N.J., U.S.A.) or the Biomolecular Resource  
495 Facility at ANU. Single colonies from the streaked LBA plates were used to confirm growth  
496 of the clone in liquid M9–F media, as described above, and to inoculate LBA cultures, from  
497 which plasmid DNA was extracted.

498 **Molecular dynamics simulations.** MD simulations were initialized from the HEPES-bound  
499 and unliganded PaCDT structures (PDB: 3KBR, 5HPQ). The structure of PaCDT trimer was  
500 generated from the monomer structure by application of the crystallographic three-fold  
501 rotation operation. Small molecules were removed from the structures, and missing side-  
502 chains and a missing residue (Gln190) in the HEPES-bound structure were modelled in  
503 MODELLER<sup>53</sup>. N-terminal acetyl caps and C-terminal amide caps were added using  
504 MODELLER and Coot<sup>47</sup>. MD simulations were performed using GROMACS version 4.5.5  
505 (ref. <sup>54</sup>) for the HEPES-bound structure and GROMACS version 4.6.5 for the unliganded  
506 structure, using the GROMOS 53a6 force field<sup>55</sup> in both cases. The protein was solvated in a  
507 rhombic dodecahedron with SPC water molecules, such that the minimal distance of the  
508 protein to the periodic boundary was 15  $\text{\AA}$ , and 15 Na<sup>+</sup> ions were added to neutralize the

509 system. Energy minimization was achieved using the steepest descent algorithm. A 100 ps  
510 isothermal (NVT) MD simulation with position restraints on the protein was used to  
511 equilibrate the system at 300 K. For production MD simulations of the NPT ensemble, the  
512 temperature was maintained at 300 K using Berendsen's thermostat ( $\tau_T = 0.1$  ps), and the  
513 pressure was maintained at 1 bar using Berendsen's barostat ( $\tau_p = 0.5$  ps, compressibility =  
514  $4.5 \times 10^{-5}$  bar<sup>-1</sup>). All protein bonds were constrained with the LINCS algorithm; water  
515 molecules were constrained using the SETTLE algorithm; the time step for numerical  
516 integration was 2 fs; the cut-offs for short-range electrostatics and van der Waals forces were  
517 9 Å and 14 Å, respectively; the Particle-Mesh Ewald method was used to evaluate long-range  
518 electrostatics; neighbor lists were updated every 10 steps. Following a 1 ns equilibration  
519 phase, which was not considered in the analysis, the four simulations of the HEPES-bound  
520 structure were continued for 100 ns, and the four simulations of the unliganded structure were  
521 continued for 170 ns.

522 An additional 150 ns simulation was performed in Desmond version 4.8 (Schrödinger  
523 2016-4) (ref. <sup>56-58</sup>) using the OPLS3 force field<sup>59</sup>. Simulations were initiated from the same  
524 starting structure used in the 5HPQ GROMOS simulations, except that Desmond was used to  
525 add the N-terminal acetyl caps and C-terminal amide caps, and for energy minimization of  
526 the protein structure. The protein was solvated in an orthorhombic box (15 Å periodic  
527 boundary) with TIP3P water molecules. Na<sup>+</sup> ions were added to neutralize the system.  
528 Energy minimization was achieved using the steepest descent algorithm (2000 iterations and  
529 a convergence threshold of 1 kcal/mol/Å). The system was relaxed using the default  
530 Desmond relaxation procedure at 300 K. For production MD simulations of the NPT  
531 ensemble, the temperature was maintained at 300 K using a Nosé-Hoover thermostat ( $\tau_T =$   
532 1.0), and the pressure was maintained at 1.01 bar ( $\tau_p = 2.0$ ) using a Martyna-Tobias-Klein

533 barostat. Otherwise, default Desmond options were used. Following equilibration (160 ps),  
534 the simulation was run for 150 ns.

535 **Structural analysis.** Residues in extant CDT homologs (Ws0279, Pu1068, Ea1174, PaCDT)  
536 are numbered according to the equivalent position in the ancestral proteins. Bio3D<sup>60</sup> was used  
537 for root-mean-square deviation, radius of gyration, and interdomain angle calculations, and  
538 principal component analysis. These analyses were performed on the 3KBR and 5HPQ-  
539 GROMOS simulations using protein backbone atoms (N, C, C $\alpha$ ) of individual protein  
540 subunits at 0.1 ns intervals. The 5HPQ-OPLS simulations were analyzed separately and  
541 projected onto the principal components derived from the 3KBR and 5HPQ-GROMOS  
542 simulations. The interdomain angle was calculated as the angle between the centers of mass  
543 of three groups of backbone atoms: the large domain (residues 2–97 and 196–234), the hinge  
544 region (residues 96–98 and 196–198) and the small domain (residues 98–195). Hinge axes for  
545 rigid-body domain displacements were determined using DynDom<sup>61</sup> (**Extended Data Fig.**  
546 **6d**). PROPKA<sup>62</sup> was used for pK<sub>a</sub> prediction.

547 **Intrinsic tryptophan fluorescence spectroscopy.** Intrinsic tryptophan fluorescence spectra  
548 were recorded using a Cary Eclipse fluorimeter. Pu1068 was prepared at a concentration of 5  
549  $\mu$ M in DSF buffer. The excitation wavelength was 280 nm, and emission was measured  
550 between 300 nm and 400 nm. Following addition of each aliquot of NDSB-221, the sample  
551 was incubated at ambient temperature for 1 min before the fluorescence spectrum was  
552 recorded. The  $K_d$  for the Pu1068/NDSB-221 interaction was calculated by fitting the  
553 fluorescence data to a hyperbolic binding curve:  $F = F_0 + (F_{\max} - F_0) \times [L]/(K_d + [L])$ , where  
554  $F$  is fluorescence,  $F_0$  and  $F_{\max}$  are initial and final fluorescence, and  $[L]$  is ligand  
555 concentration.



556 **References**

- 557 1. Baier, F., Copp, J. N. & Tokuriki, N. Evolution of enzyme superfamilies:  
558 comprehensive exploration of sequence-function relationships. *Biochemistry* **55**, 6375–  
559 6388 (2016).
- 560 2. Khersonsky, O. & Tawfik, D. S. Enzyme promiscuity: a mechanistic and evolutionary  
561 perspective. *Annu. Rev. Biochem.* **79**, 471–505 (2010).
- 562 3. Furnham, N., Dawson, N. L., Rahman, S. A., Thornton, J. M. & Orengo, C. A. Large-  
563 scale analysis exploring evolution of catalytic machineries and mechanisms in enzyme  
564 superfamilies. *J. Mol. Biol.* **428**, 253–267 (2016).
- 565 4. Harms, M. J. & Thornton, J. W. Evolutionary biochemistry: revealing the historical  
566 and physical causes of protein properties. *Nat. Rev. Genet.* **14**, 559–571 (2013).
- 567 5. Tam, R. & Saier, M. H. A bacterial periplasmic receptor homologue with catalytic  
568 activity: cyclohexadienyl dehydratase of *Pseudomonas aeruginosa* is homologous to  
569 receptors specific for polar amino acids. *Res. Microbiol.* **144**, 165–169 (1993).
- 570 6. Ngaki, M. N. *et al.* Evolution of the chalcone-isomerase fold from fatty-acid binding to  
571 stereospecific catalysis. *Nature* **485**, 530–533 (2012).
- 572 7. Ortmayer, M. *et al.* An oxidative N-demethylase reveals PAS transition from  
573 ubiquitous sensor to enzyme. *Nature* **539**, 593–597 (2016).
- 574 8. Berntsson, R. P.-A., Smits, S. H. J., Schmitt, L., Slotboom, D.-J. & Poolman, B. A  
575 structural classification of substrate-binding proteins. *FEBS Lett.* **584**, 2606–2617  
576 (2010).
- 577 9. Zhao, G., Xia, T., Fischer, R. S. & Jensen, R. A. Cyclohexadienyl dehydratase from  
578 *Pseudomonas aeruginosa*: molecular cloning of the gene and characterization of the  
579 gene product. *J. Biol. Chem.* **267**, 2487–2493 (1992).
- 580 10. Malashkevich, V. N. *et al.* Crystal structure of putative binding component of ABC  
581 transporter from *Wolinella succinogenes* DSM 1740 complexed with lysine. *Protein*  
582 *Data Bank* <http://dx.doi.org/10.2210/pdb3k4u/pdb> (2009).
- 583 11. Tan, K., Marshall, N., Buck, K., Joachimiak, A. & Genomics, M. C. for S. The crystal

- 584 structure of cyclohexadienyl dehydratase precursor from *Pseudomonas aeruginosa*  
585 PA01. *Protein Data Bank* <http://dx.doi.org/10.2210/pdb3kbr/pdb> (2009).
- 586 12. Hochberg, G. K. A. & Thornton, J. W. Reconstructing ancient proteins to understand  
587 the causes of structure and function. *Annu. Rev. Biophys* **46**, 247–69 (2017).
- 588 13. Gouridis, G. *et al.* Conformational dynamics in substrate-binding domains influences  
589 transport in the ABC importer GlnPQ. *Nat. Struct. Mol. Biol.* **22**, 57–64 (2014).
- 590 14. Marvin, J. S. & Hellinga, H. W. Manipulation of ligand binding affinity by  
591 exploitation of conformational coupling. *Nat. Struct. Mol. Biol.* **8**, 795–798 (2001).
- 592 15. Campbell, E. *et al.* The role of protein dynamics in the evolution of new enzyme  
593 function. *Nat. Chem. Biol.* **12**, 944–950 (2016).
- 594 16. Bar-Even, A., Milo, R., Noor, E. & Tawfik, D. S. The moderately efficient enzyme:  
595 futile encounters and enzyme floppiness. *Biochemistry* **54**, 4969–4977 (2015).
- 596 17. Bermejo, G. A., Strub, M.-P., Ho, C. & Tjandra, N. Ligand-free open-closed  
597 transitions of periplasmic binding proteins: the case of glutamine-binding protein.  
598 *Biochemistry* **49**, 1893–902 (2010).
- 599 18. Silva, D.-A., Domínguez-Ramírez, L., Rojo-Domínguez, A. & Sosa-Peinado, A.  
600 Conformational dynamics of L-lysine, L-arginine, L-ornithine binding protein reveals  
601 ligand-dependent plasticity. *Proteins* **79**, 2097–2108 (2011).
- 602 19. Chu, B. C. H., Chan, D. I., DeWolf, T., Periole, X. & Vogel, H. J. Molecular dynamics  
603 simulations reveal that apo-HisJ can sample a closed conformation. *Proteins* **82**, 386–  
604 98 (2014).
- 605 20. Sugrue, E., Carr, P. D., Scott, C. & Jackson, C. J. Active site desolvation and  
606 thermostability tradeoffs in the evolution of catalytically diverse triazine hydrolases.  
607 *Biochemistry* **55**, 6304–6313 (2016).
- 608 21. Moroz, Y. S. *et al.* New tricks for old proteins: single mutations in a non-enzymatic  
609 protein give rise to various enzymatic activities. *J. Am. Chem. Soc.* **137**, 14905–14911  
610 (2015).
- 611 22. Tokuriki, N. *et al.* Diminishing returns and tradeoffs constrain the laboratory

- 612 optimization of an enzyme. *Nat. Comm.* **3**, 1257 (2012).
- 613 23. Anderson, D. P. *et al.* Evolution of an ancient protein function involved in organized  
614 multicellularity in animals. *eLife* **5**, e10147 (2016).
- 615 24. Huang, P.-S., Boyken, S. E. & Baker, D. The coming of age of de novo protein design.  
616 *Nature* **537**, 320–327 (2016).
- 617 25. Burton, A. J., Thomson, A. R., Dawson, W. M., Brady, R. L. & Woelfson, D. N.  
618 Installing hydrolytic activity into a completely de novo protein framework. *Nat. Chem.*  
619 **8**, 837–844 (2016).
- 620 26. Röthlisberger, D. *et al.* Kemp elimination catalysts by computational enzyme design.  
621 *Nature* **453**, 190–195 (2008).
- 622 27. Mak, W. S. & Siegel, J. B. Computational enzyme design: Transitioning from catalytic  
623 proteins to enzymes. *Curr. Opin. Struct. Biol.* **27C**, 87–94 (2014).
- 624 28. Korendovych, I. V & DeGrado, W. F. Catalytic efficiency of designed catalytic  
625 proteins. *Curr. Opin. Struct. Biol.* **27**, 113–121 (2014).
- 626 29. Blomberg, R. *et al.* Precision is essential for efficient catalysis in an evolved Kemp  
627 eliminase. *Nature* **503**, 418–421 (2013).
- 628 30. Khersonsky, O. *et al.* Bridging the gaps in design methodologies by evolutionary  
629 optimization of the stability and proficiency of designed Kemp eliminase KE59. *Proc.*  
630 *Natl. Acad. Sci.* **109**, 10358–10363 (2012).
- 631 31. Engler, C., Kandzia, R. & Marillonnet, S. A one pot, one step, precision cloning  
632 method with high throughput capability. *PLoS One* **3**, e3647 (2008).
- 633 32. Baba, T. *et al.* Construction of Escherichia coli K-12 in-frame, single-gene knockout  
634 mutants: the Keio collection. *Mol. Syst. Biol.* **2**, 2006.0008 (2006).
- 635 33. Edgar, R. C. MUSCLE: multiple sequence alignment with high accuracy and high  
636 throughput. *Nucleic Acids Res.* **32**, 1792–1797 (2004).
- 637 34. Clifton, B. E. & Jackson, C. J. Ancestral protein reconstruction yields insights into  
638 adaptive evolution of binding specificity in solute-binding proteins. *Cell Chem. Biol.*  
639 **23**, 236–245 (2016).

- 640 35. Guindon, S. *et al.* New algorithms and methods to estimate maximum-likelihood  
641 phylogenies: assessing the performance of PhyML 3.0. *Syst. Biol.* **59**, 307–321 (2010).
- 642 36. Abascal, F., Zardoya, R. & Posada, D. ProtTest: selection of best-fit models of protein  
643 evolution. *Bioinformatics* **21**, 2104–2105 (2005).
- 644 37. Yang, Z. PAML 4: phylogenetic analysis by maximum likelihood. *Mol. Biol. Evol.* **24**,  
645 1586–1591 (2007).
- 646 38. Gibson, D. G. *et al.* Enzymatic assembly of DNA molecules up to several hundred  
647 kilobases. *Nat. Methods* **6**, 12–16 (2009).
- 648 39. McKellar, J. L., Minnell, J. J. & Gerth, M. L. A high-throughput screen for ligand  
649 binding reveals the specificities of three amino acid chemoreceptors from  
650 *Pseudomonas syringae* pv. *actinidiae*. *Mol. Microbiol.* **96**, 694–707 (2015).
- 651 40. Gibson, F. Chorismic acid: purification and some chemical and physical studies.  
652 *Biochem. J.* **90**, 256–261 (1964).
- 653 41. Gibson, M. I. & Gibson, F. Preliminary studies on the isolation and metabolism of an  
654 intermediate in aromatic biosynthesis: chorismic acid. *Biochem. J.* **90**, 248–256  
655 (1964).
- 656 42. McPhillips, T. M. *et al.* Blu-Ice and the Distributed Control System: software for data  
657 acquisition and instrument control at macromolecular crystallography beamlines. *J*  
658 *Synchrotron Radiat* **9**, 401–406 (2002).
- 659 43. Battye, T. G. G., Kontogiannis, L., Johnson, O., Powell, H. R. & Leslie, A. G. W.  
660 iMOSFLM: a new graphical interface for diffraction-image processing with  
661 MOSFLM. *Acta Crystallogr. D Biol. Crystallogr.* **67**, 271–281 (2011).
- 662 44. Kabsch, W. XDS. *Acta Crystallogr. D Biol. Crystallogr.* **66**, 125–132 (2010).
- 663 45. Winn, M. D. *et al.* Overview of the CCP4 suite and current developments. *Acta*  
664 *Crystallogr. D Biol. Crystallogr.* **67**, 235–242 (2011).
- 665 46. McCoy, A. J. *et al.* Phaser crystallographic software. *J. Appl. Cryst.* **40**, 658–674  
666 (2007).
- 667 47. Emsley, P., Lohkamp, B., Scott, W. G. & Cowtan, K. Features and development of

- 668 Coot. *Acta Crystallogr. D Biol. Crystallogr.* **66**, 486–501 (2010).
- 669 48. Murshudov, G. N., Vagin, A. A. & Dodson, E. J. Refinement of macromolecular  
670 structures by the maximum-likelihood method. *Acta Crystallogr. D Biol. Crystallogr.*  
671 **53**, 240–255 (1997).
- 672 49. Adams, P. D. *et al.* PHENIX: A comprehensive Python-based system for  
673 macromolecular structure solution. *Acta Crystallogr. Sect. D Biol. Crystallogr.* **66**,  
674 213–221 (2010).
- 675 50. Zhao, H. & Zha, W. In vitro ‘sexual’ evolution through the PCR-based staggered  
676 extension process (StEP). *Nat. Protoc.* **1**, 1865–1871 (2006).
- 677 51. Herman, A. & Tawfik, D. S. Incorporating Synthetic Oligonucleotides via Gene  
678 Reassembly (ISOR): a versatile tool for generating targeted libraries. *Protein Eng.*  
679 *Des. Sel.* **20**, 219–226 (2007).
- 680 52. Rockah-Shmuel, L., Tawfik, D. S. & Goldsmith, M. in *Directed Evolution Library*  
681 *Creation: Methods and Protocols* (eds. Gillam, E. M. J., Copp, J. N. & Ackerley, D.  
682 F.) **1179**, 129–137 (Springer-Verlag, 2014).
- 683 53. Sali, A. & Blundell, T. L. Comparative protein modelling by satisfaction of spatial  
684 restraints. *J. Mol. Biol.* **234**, 779–815 (1993).
- 685 54. Pronk, S. *et al.* GROMACS 4.5: a high-throughput and highly parallel open source  
686 molecular simulation toolkit. *Bioinformatics* **29**, 845–854 (2013).
- 687 55. Oostenbrink, C., Villa, A., Mark, A. E. & van Gunsteren, W. F. A biomolecular force  
688 field based on the free enthalpy of hydration and solvation: the GROMOS force-field  
689 parameter sets 53A5 and 53A6. *J. Comput. Chem.* **25**, 1656–76 (2004).
- 690 56. Shivakumar, D. *et al.* Prediction of absolute solvation free energies using molecular  
691 dynamics free energy perturbation and the OPLS force field. *J Chem Theory Comput*  
692 **6**, 1509–1519 (2010).
- 693 57. Guo, Z. *et al.* Probing the  $\alpha$ -helical structural stability of stapled p53 peptides:  
694 molecular dynamics simulations and analysis. *Chem Biol Drug Des* **75**, 348–359  
695 (2010).

- 696 58. Bowers, K. *et al.* Scalable algorithms for molecular dynamics simulations on  
697 commodity clusters. *Proc. ACM/IEEE SC Conf. Supercomput. (SC06), Tampa, Florida*  
698 November 11–17 (2006). doi:10.1109/SC.2006.54
- 699 59. Harder, E. *et al.* OPLS3: A Force Field Providing Broad Coverage of Drug-like Small  
700 Molecules and Proteins. *J. Chem. Theory Comput.* **12**, 281–296 (2016).
- 701 60. Grant, B. J., Rodrigues, A. P. C., ElSawy, K. M., McCammon, J. A. & Caves, L. S. D.  
702 Bio3D: an R package for the comparative analysis of protein structures. *Bioinformatics*  
703 **22**, 2695–2696. (2006).
- 704 61. Hayward, S. & Berendsen, H. J. Systematic analysis of domain motions in proteins  
705 from conformational change: new results on citrate synthase and T4 lysozyme.  
706 *Proteins* **30**, 144–154 (1998).
- 707 62. Olsson, M. H. M., Søndergaard, C. R., Rostkowski, M. & Jensen, J. H. PROPKA3:  
708 consistent treatment of internal and surface residues in empirical pKa calculations. *J.*  
709 *Chem. Theory Comput.* **7**, 525–537 (2011).
- 710 63. Giuliani, S. E., Frank, A. M. & Collart, F. R. Functional assignment of solute-binding  
711 proteins of ABC transporters using a fluorescence-based thermal shift assay.  
712 *Biochemistry* **47**, 13974–13984 (2008).

713

714 **Acknowledgements**

715 B.E.C. and J.A.K. were supported by Australian Postgraduate Awards. B.E.C. was also  
716 supported by a Rod Rickards PhD Scholarship and an Alan Sargeson scholarship. This  
717 research was undertaken with the assistance of resources, services, and staff from the  
718 Australian National Computational Infrastructure (NCI) and the Australian Synchrotron, and  
719 funding from the Australian Research Council Discovery Project scheme (C.J.J.). We thank  
720 A. Saeed, P. Yates, L. Tan and S. L. Warring for additional technical contributions.

721 **Author contributions**

722 B.E.C. and C.J.J. conceived the study; B.E.C. performed computational analysis; J.A.K.,  
723 B.E.C., and M.L.G. performed experimental characterization of proteins; B.E.C., J.A.K.,  
724 P.D.C. and C.J.J. solved the crystal structures; N. T. and C. J. J. supervised students; B.E.C.,  
725 J.A.K., and C.J.J. wrote the paper. All authors contributed to experimental design, editing the  
726 paper, and interpretation of results.

727 **Author information**

728 Crystal structures have been deposited in the Protein Data Bank under accession codes 5HPQ  
729 (PaCDT, space group *H3*), 5JOT (PaCDT, space group *P4<sub>3</sub>22*), 5HMT (Pu1068, unliganded),  
730 5KKW (Pu1068, NDSB-221 complex), 5TUJ (AncCDT-1, unliganded), 5T0W (AncCDT-1,  
731 L-arginine complex), and 5JOS (AncCDT-3(P188L)). The authors declare no competing  
732 financial interests. Correspondence and requests for materials should be addressed to C.J.J.  
733 (colin.jackson@anu.edu.au).

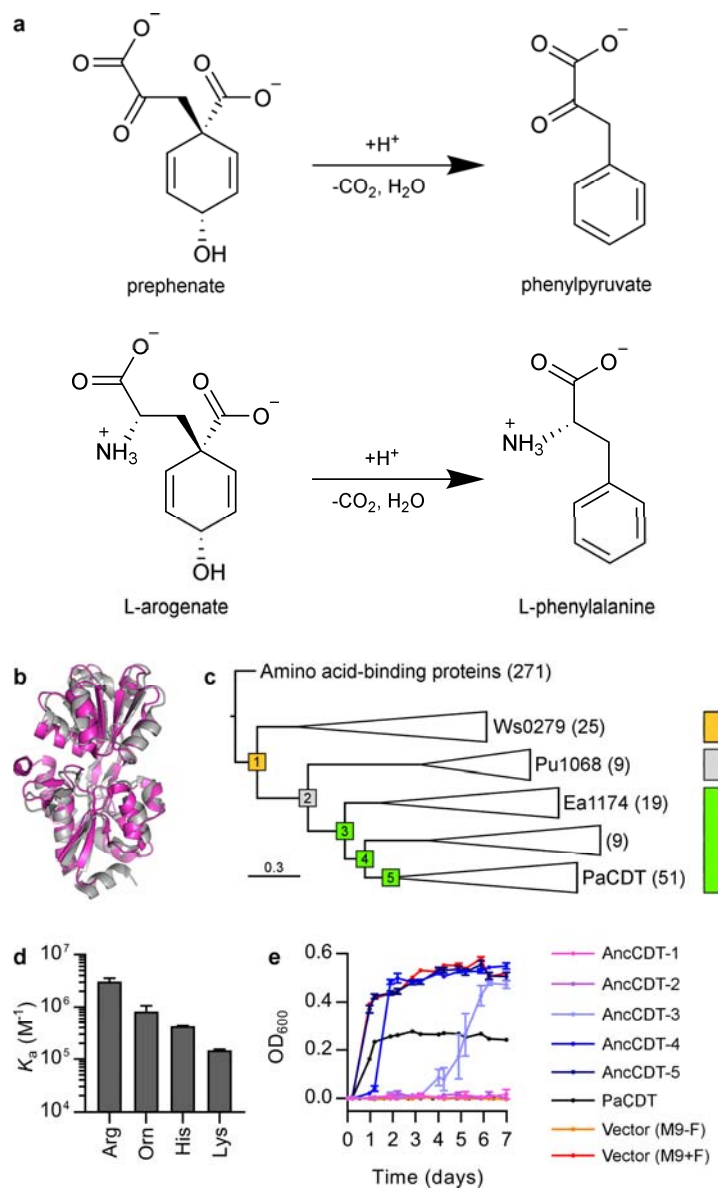

734

735 **Figure 1. Functional evolution of CDT.** **a**, Fragmentation reactions of prephenate and L-  
736 aroenate catalyzed by CDT. **b**, Structural similarity between PaCDT (grey; PDB: 3KBR)  
737 and Ws0279 (pink; PDB: 3K4U) (root-mean-square deviation 2.25 Å for backbone atoms). **c**,  
738 Condensed maximum-likelihood phylogeny of CDT homologs. The scale bar represents the  
739 mean number of substitutions per site. The five compressed clades are labeled with the  
740 corresponding number of sequences and the representative extant protein characterized in this  
741 work. The five ancestral nodes that were characterized experimentally (AncCDT-1 to  
742 AncCDT-5) are labeled and colored according to function (gold, amino acid binding; grey,  
743 binding of unknown solute; green, CDT). **d**, Affinity of AncCDT-1 for cationic amino acids,  
744 determined by ITC (Orn, L-ornithine). Results are mean  $\pm$  s.d. for two (Orn, Lys) or three  
745 (Arg, His) titrations. **e**, Growth of auxotrophic *E. coli*  $\Delta$ *pheA* cells complemented with  
746 ancestral proteins or PaCDT in selective M9-F media. Growth curves of empty vector  
747 transformants in selective M9-F media and unselective M9+F media are shown as negative  
748 and positive controls, respectively. Results are mean  $\pm$  s.e.m. for four biological replicates  
749 (AncCDT-5) or five biological replicates (otherwise).



750

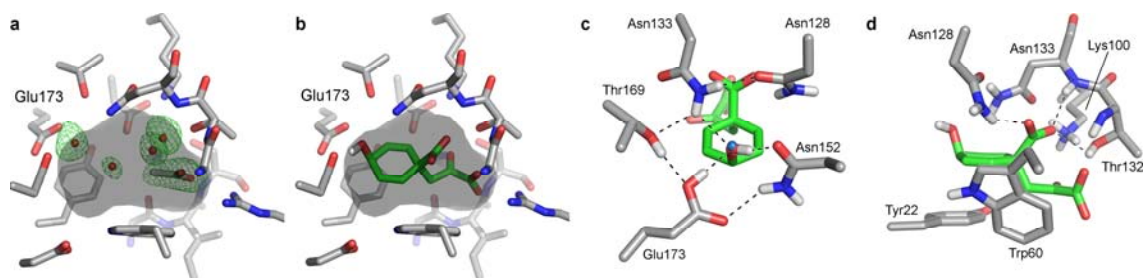

751 **Figure 2. Crystal structure of PaCDT.** **a**, Active site of PaCDT. The surface of the active  
752 site is shown in grey. Electron density for water and acetate molecules is shown by an omit  
753  $mF_o - DF_c$  map contoured at  $+3\sigma$ . **b**, Structure of the PaCDT-prephenate complex predicted  
754 by computational docking. Docking with L-arogenate yielded a similar pose. **c**, Glu173 is  
755 poised for proton donation to the departing hydroxyl group of prephenate by hydrogen  
756 bonding interactions with neighboring residues. The position predicted to be occupied by the  
757 hydroxyl group of prephenate is occupied by a water molecule in the unliganded PaCDT  
758 structure (blue sphere). **d**,  $\pi$ -stacking interactions with Tyr22 and Trp60, and polar  
759 interactions with Lys100, Asn128, Thr132, and Asn133 could contribute to transition state  
760 stabilization.

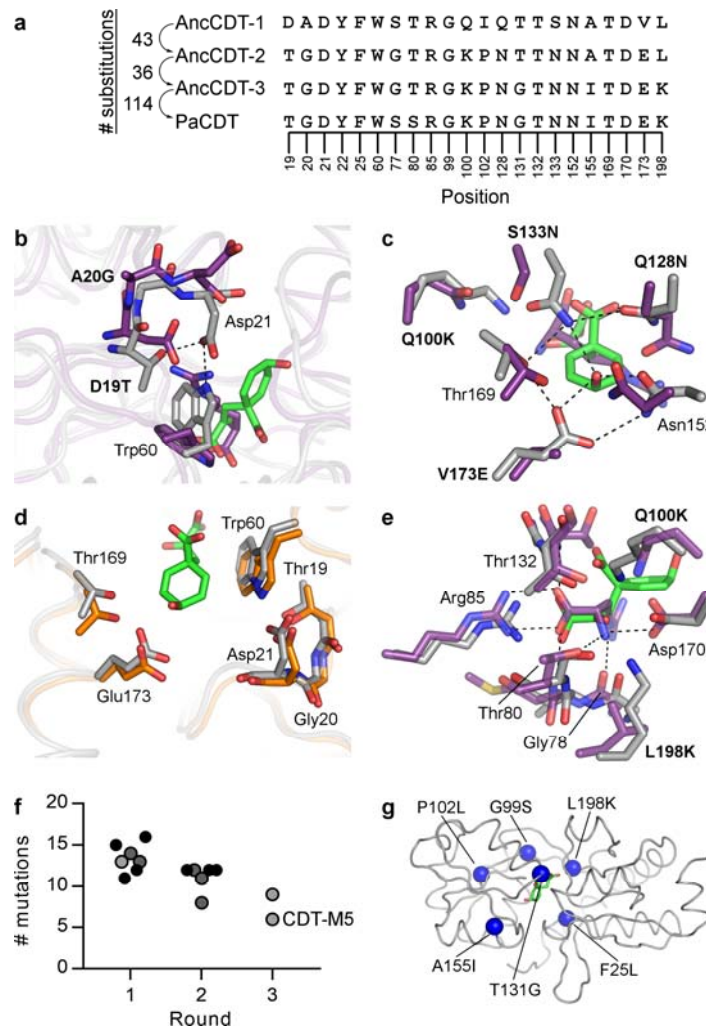

761

762 **Figure 3. Structural and mutational basis for evolution of CDT activity.** **a**, Multiple  
763 sequence alignment of ancestral proteins and PaCDT at positions important for CDT activity.  
764 The number of substitutions between each sequence in this evolutionary trajectory is shown.  
765 **b-e**, Comparison of AncCDT-1 (purple), Pu1068 (orange), and PaCDT (grey). Positions are  
766 labeled with the corresponding residue in AncCDT-1 and AncCDT-3, if conserved in both  
767 proteins, or with the corresponding substitution between the two proteins. **b**, The ancestral  
768 binding site was remodeled by a conformational change of Trp60. D19T introduces a  
769 hydrogen bond with Asp21, and A20G enables a conformation disfavored for non-glycine  
770 residues but necessary for the interaction between Thr19 and Asp21. **c**, Functionalization of  
771 the ancestral binding site introduced the general acid Glu173 and residues required for  
772 substrate binding and transition state stabilization. **d**, Structural similarities between Pu1068  
773 and PaCDT. The two domains of Pu1068 were superimposed separately on the structure of  
774 PaCDT. **e**, CDT inherited the  $\alpha$ -amino acid-binding motif from AncCDT-1, with two  
775 substitutions (Q100K, L198K) that also enable binding of the  $\alpha$ -keto acid prephenate. **f**,  
776 Introduction of CDT activity into AncCDT-2 by directed evolution. Each point represents a  
777 unique clone, and the color gives a qualitative indication of activity (black, high activity;  
778 dark grey, moderate activity; light grey, low activity). See also **Extended Data Figure 8**. **g**,  
779 Positions of six substitutions sufficient to introduce CDT activity into AncCDT-2. F25L,  
780 G99S, P102L and A155I are located in the second or third shells of the active site.

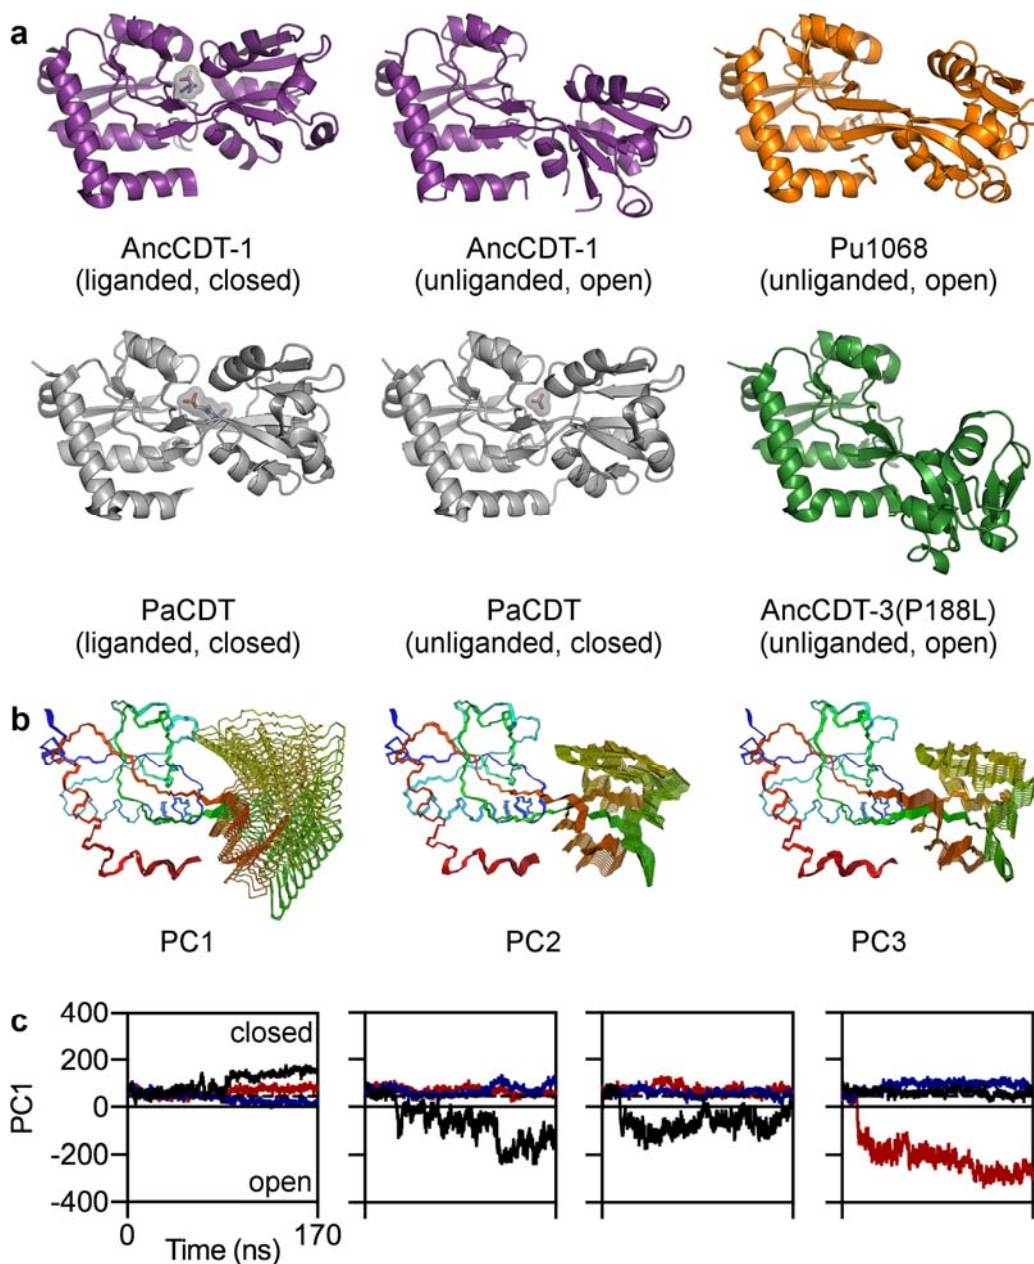

781

782 **Figure 4. Structural dynamics of CDT.** **a**, Open and closed structures of AncCDT-1,  
783 Pu1068, PaCDT, and AncCDT-3(P188L). Unusually, PaCDT adopts a closed structure in the  
784 absence of ligand. **b**, Principal component analysis of MD simulations of PaCDT. The  
785 structures illustrating the physical interpretation of the first three principal components (PCs)  
786 were generated by interpolating between structures at the extremities of each principal  
787 component axis. These motions represent hinge-bending and hinge-twisting motions typical  
788 of AABPs<sup>18,19</sup>. **c**, Open-closed conformational dynamics in  $4 \times 170$  ns simulations of PaCDT,  
789 initialized from the unliganded structure (PDB: 5HPQ) using the GROMOS 53a6 force field.  
790 Projections of the trajectories of individual PaCDT subunits onto the PC1 axis are shown.  
791 Each color represents a subunit of the PaCDT homotrimer. The dotted line represents the  
792 crystallographic conformation (PDB: 5HPQ).

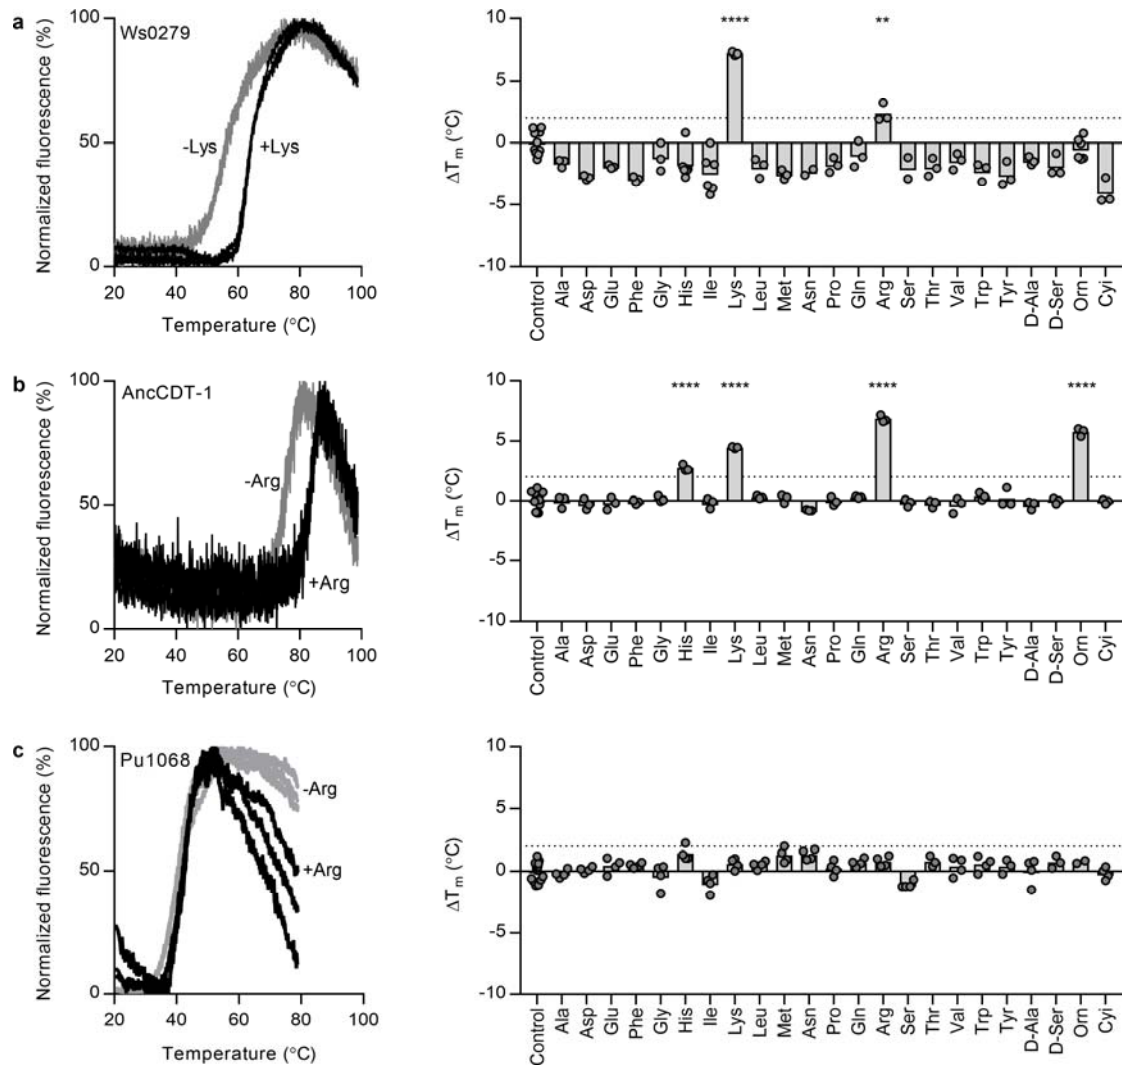

793

794 **Extended Data Figure 1. Amino acid binding profiles of Ws0279, AncCDT-1, and**  
 795 **Pu1068. a, Ws0279. b, AncCDT-1. c, Pu1068.** Left panels: examples of fluoresce-  
 796 monitored thermal denaturation data in the absence (grey) and presence (black) of an amino  
 797 acid. Three replicate curves are shown for each condition. Right panels: melting tempera-  
 798 ( $T_M$ ) of each protein in the presence of amino acids (10 mM, except for Trp, Tyr and Cyl at 1  
 799 mM), relative to a protein-only control. Columns represent the mean of the experimen-  
 800 tal replicates, shown as circles. Asterisks indicate  $\Delta T_M > 2$  °C and significantly different from  
 801 the control by one-way ANOVA with Dunnett's test for multiple comparisons (\*\* $P < 0.01$ ,  
 802 \*\*\*\* $P < 0.0001$ ). The  $\Delta T_M$  for Ws0279 was 7.2 °C with 10 mM Lys and 6.1 °C with 1 mM  
 803 Lys, comparable with  $\Delta T_M$  values observed for other AABPs in the presence of their  
 804 physiological ligands<sup>63</sup>.

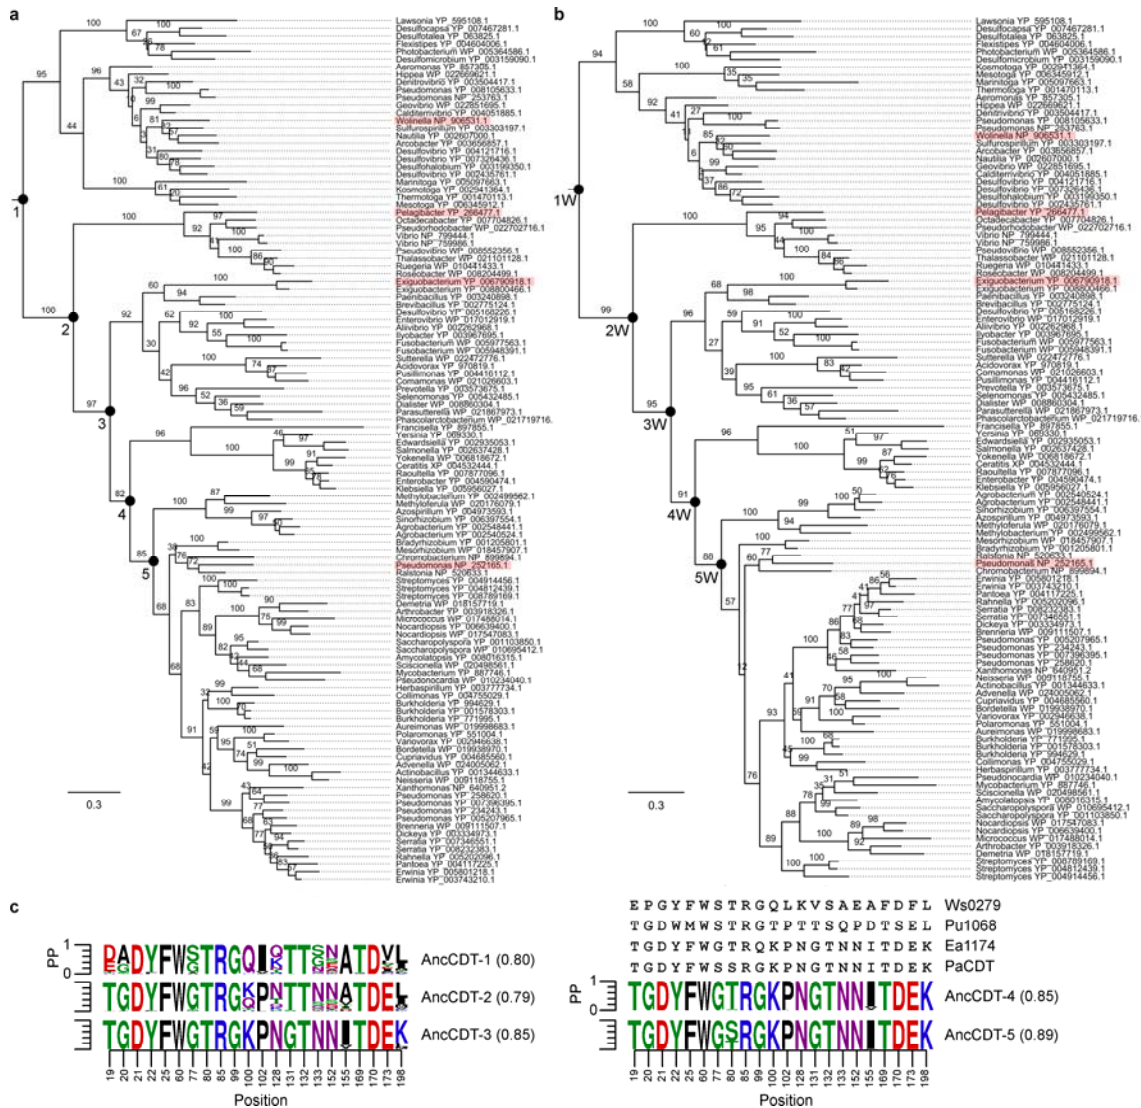

805

806 **Extended Data Figure 2. Phylogenetic analysis of CDT homologs.** **a-b**, Maximum-  
807 likelihood phylogenies inferred using the LG substitution matrix (**a**) and the WAG  
808 substitution matrix (**b**). Branches are labeled with bootstrap values from 100 replicates. For  
809 each protein sequence, the NCBI accession code and the genus of the source organism are  
810 given. Experimentally characterized extant proteins are highlighted, and experimentally  
811 characterized ancestral nodes are labeled. The scale bar represents the mean number of  
812 substitutions per site. The outgroup of 271 AABP sequences is not shown. **c**, Posterior  
813 probability distributions of ancestral protein sequences at positions important for amino acid  
814 binding or CDT activity, as indicated by structural analysis or directed evolution. The  
815 sequences of Ws0279, Pu1068, Ea1174, and PaCDT at the corresponding positions are  
816 shown. The mean posterior probability of each ancestral sequence is given in parentheses.

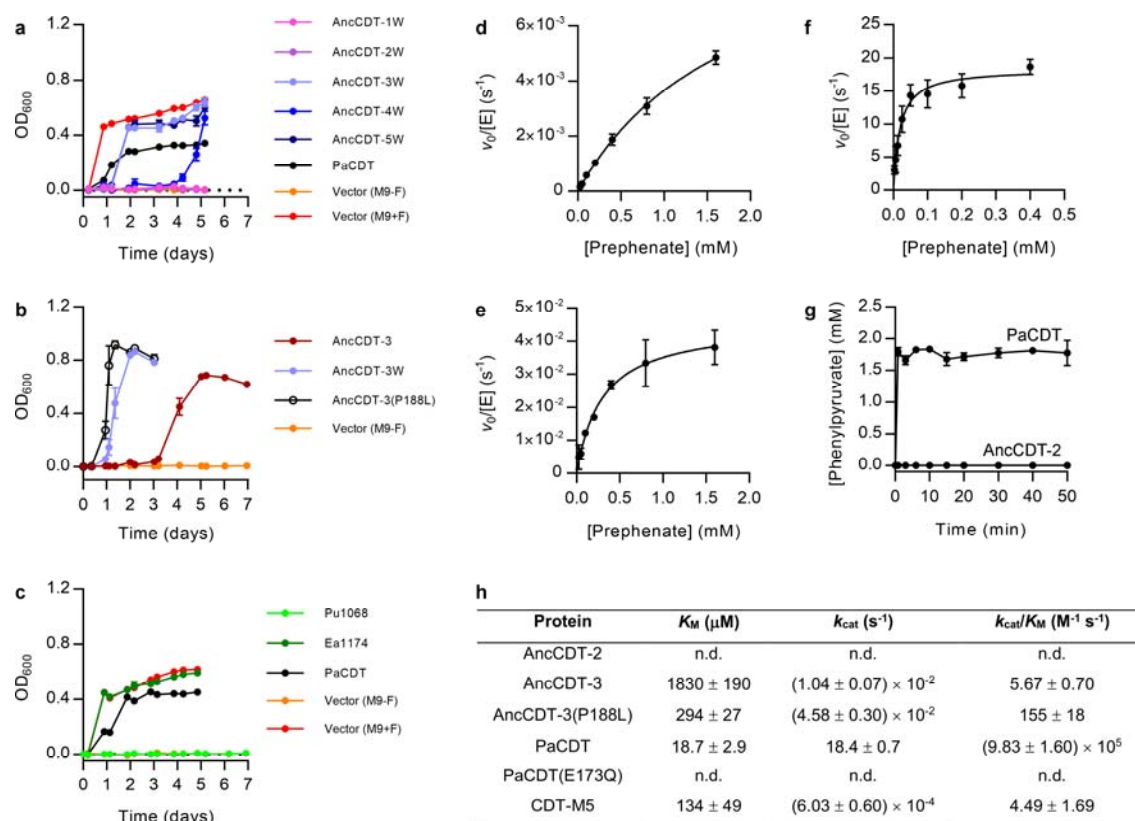

817

818 **Extended Data Figure 3. Characterization of ancestral and extant CDT variants.** **a-c**,  
819 Complementation of auxotrophic *E. coli*  $\Delta$ *pheA* cells in selective M9–F media by ancestral  
820 and extant CDT variants. Results are mean  $\pm$  s.e.m. of biological replicates (**a**,  $n = 3$ ; **b**,  $n = 5$ ;  
821 **c**,  $n = 3$ ). **a**, Alternative versions of the ancestral proteins inferred using the WAG  
822 substitution matrix (AncCDT-1W to AncCDT-5W). **b**, AncCDT-3(P188L). **c**, Pu1068 and  
823 Ea1174. **d-f**, Michaelis-Menten plots for AncCDT-3 (**d**), AncCDT-3(P188L) (**e**) and PaCDT  
824 (**f**). Results are mean  $\pm$  s.d. of technical replicates (**d**,  $n = 4$ , **e**,  $n = 3$ , **f**,  $n = 3$ ). **g**, Conversion  
825 of 1.6 mM prephenate to phenylpyruvate by 20  $\mu$ M PaCDT and AncCDT-2. No activity was  
826 detected for AncCDT-2. Results are mean  $\pm$  s.d., three technical replicates. **h**, Kinetic  
827 parameters for prephenate dehydratase activity of CDT variants characterized in this work.  
828 Errors indicate s.e. for  $K_M$  and  $k_{cat}$ , and errors propagated from these quantities for  $k_{cat}/K_M$ .  
829 n.d., no detectable activity.

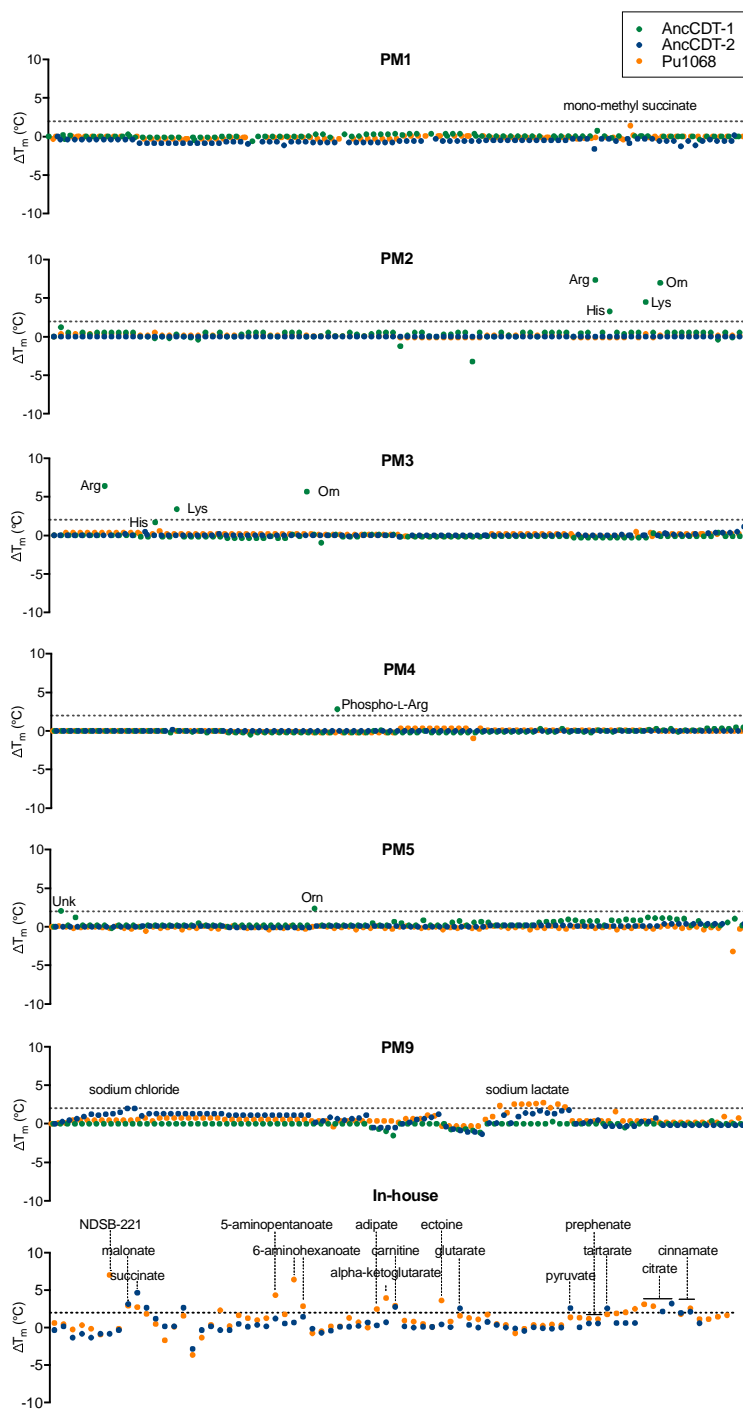

830

831 **Extended Data Figure 4. Ligand screening of Pu1068 and AncCDT-2.** DSF was used to  
832 screen Pu1068, AncCDT-2, and AncCDT-1 (as a positive control) against 650 different  
833 conditions from six proprietary screens from Biolog (PM1–5 and PM9) and an in-house  
834 screen comprised of various additional compounds.  $\Delta T_M$  values are given relative to a  
835 protein-only control. Compounds that produced a  $\Delta T_M$  greater than 2 °C are listed. No  
836 binding of prephenate, the substrate of CDT, was observed. Details of the screen  
837 compositions and ligand concentrations are provided in **Supplementary Table 3**.

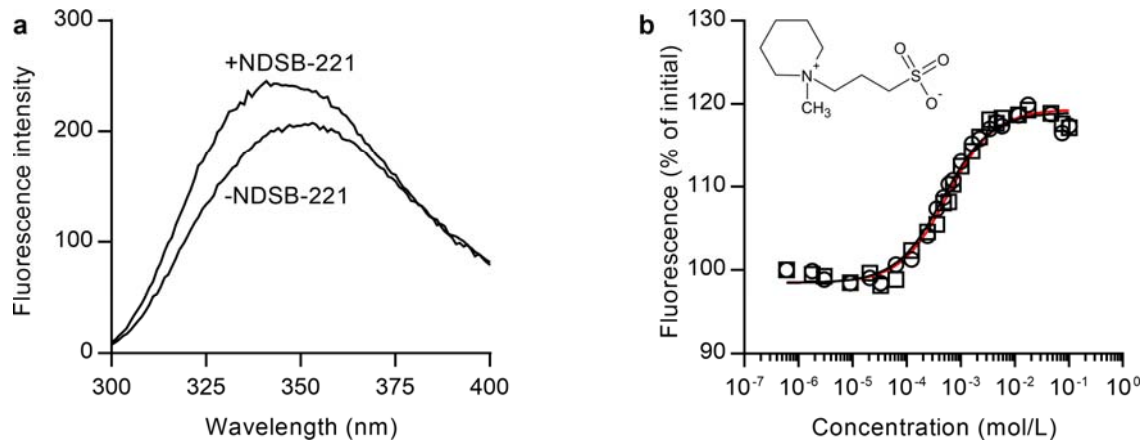

838

839 **Extended Data Figure 5. NDSB-221 is a low-affinity ligand of Pu1068.** a, Fluorescence  
840 spectrum of Pu1068 in the presence and absence of 10 mM NDSB-221, with an excitation  
841 wavelength of 280 nm. b, Fluorescence titration of Pu1068 with NDSB-221; peak  
842 fluorescence is plotted against ligand concentration. Two replicate titrations are shown.  
843 Fitting the data to a Boltzmann function gives a  $K_d$  of 530  $\mu$ M and a maximum fluorescence  
844 change of 20%. The structure of NDSB-221 is inset.



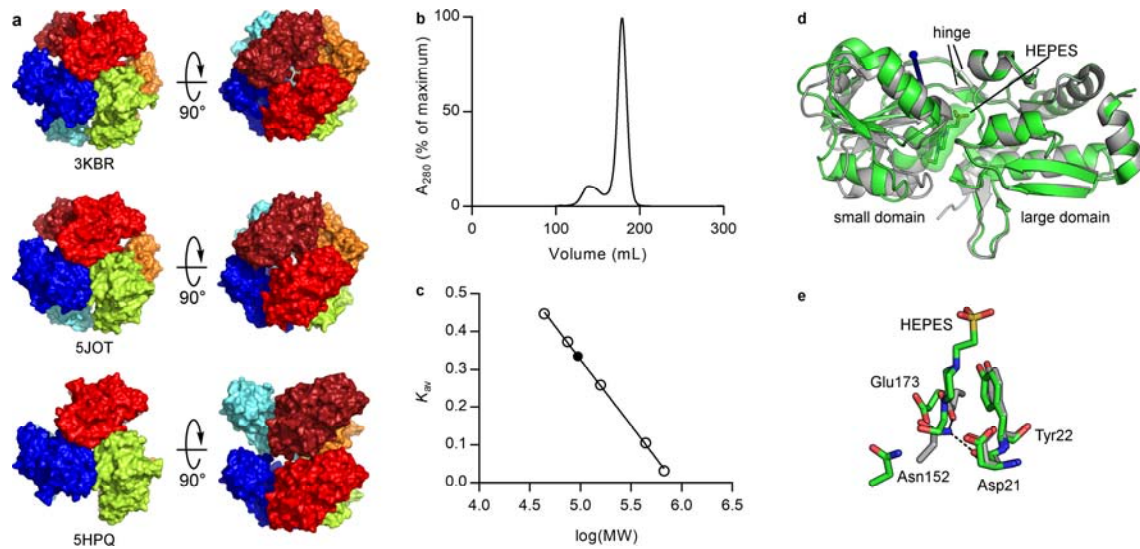

845

846 **Extended Data Figure 6. Comparison of PaCDT crystal structures.** **a**, Crystallographic  
847 oligomers of PaCDT (PDB: 3KBR, 5JOT, 5HPQ), viewed down the three-fold symmetry  
848 axis. 3KBR (HEPES-bound) and 5JOT (unliganded) show a hexameric assembly, while  
849 5HPQ (unliganded) shows a trimeric assembly. **b**, Size-exclusion chromatogram of PaCDT.  
850 **c**, Calibration curve for analytical size-exclusion chromatography. Open circles represent  
851 molecular weight standards and the closed circle represents PaCDT. The calculated molecular  
852 weight of PaCDT is consistent with a trimeric structure (calc. 94 kDa, theor. 88 kDa for  
853 trimer). **d-e**, Conformational differences between unliganded PaCDT (PDB: 5HPQ, grey) and  
854 HEPES-bound PaCDT (PDB: 3KBR, green). **d**, Superimposition of the two structures using  
855 the two large domains shows a rigid-body displacement of the small domain, which  
856 corresponds to an 11° rotation about the axis indicated by the blue arrow. This  
857 conformational change accounts for occlusion of the active site in the unliganded PaCDT  
858 structure. **e**, HEPES disrupts the hydrogen bonding network between Asp21, Asn152, and the  
859 general acid Glu173.

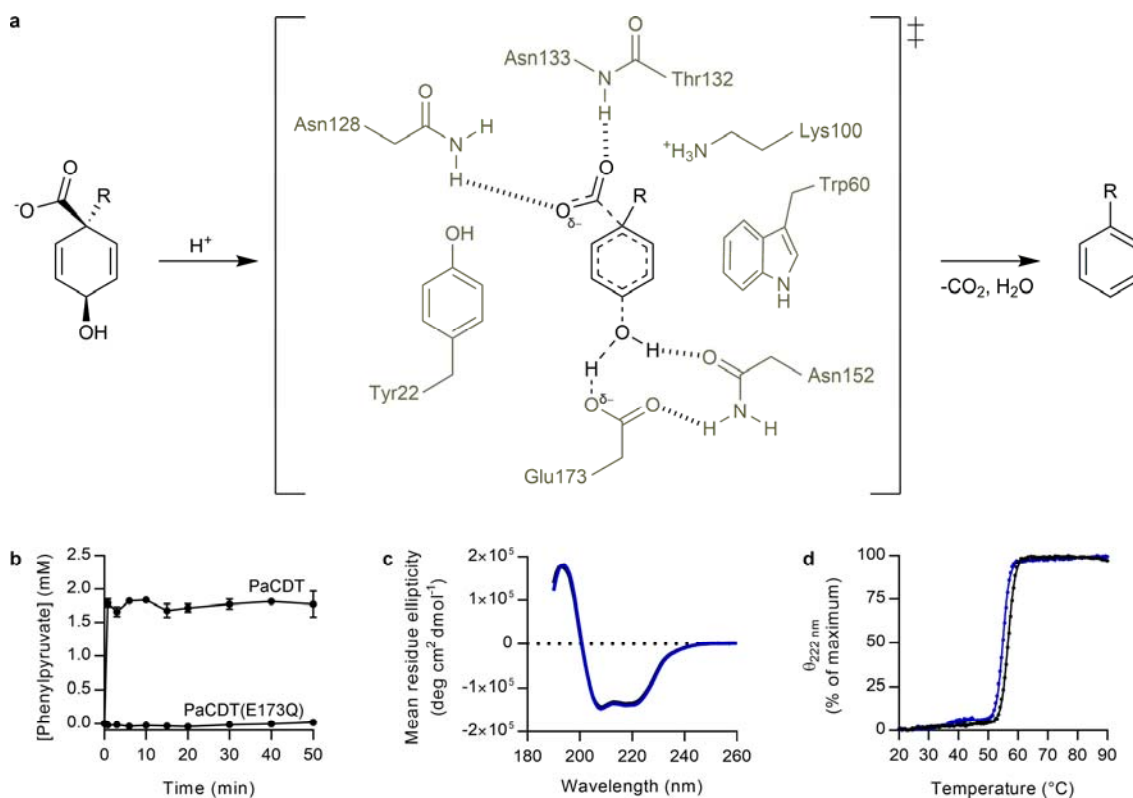

860

861 **Extended Data Figure 7. Mechanism of PaCDT.** **a**, Proposed mechanism for CDT-  
 862 catalyzed decarboxylative aromatization of cyclohexadienols, and basis for transition state  
 863 stabilization. The general acid Glu173 donates a proton to the departing hydroxyl group of  
 864 the substrate. The given mechanism shows a concerted elimination of CO<sub>2</sub> and H<sub>2</sub>O, although  
 865 stepwise elimination of H<sub>2</sub>O and CO<sub>2</sub> *via* a divinyl carbocation intermediate is an alternative  
 866 possibility. **b**, Conversion of 1.6 mM prephenate to phenylpyruvate by 20 μM PaCDT and  
 867 PaCDT(E173Q). The E173Q substitution abolishes prephenate dehydratase activity. Results  
 868 are mean ± s.d., three technical replicates. Data for PaCDT are duplicated from **Extended**  
 869 **Data Fig. 3g**; these experiments were done concurrently. **c**, Circular dichroism (CD) spectra  
 870 of PaCDT (black) and PaCDT(E173Q) (blue). The E173Q substitution does not disrupt the  
 871 secondary structure of PaCDT. **d**, CD-monitored thermal denaturation of PaCDT (black) and  
 872 PaCDT(E173Q) (blue). The E173Q substitution has minimal impact on the *T<sub>M</sub>* of PaCDT  
 873 (WT, 56.6 ± 0.0 °C; E173Q, 54.9 ± 0.2 °C; mean ± s.d. for two technical replicates).

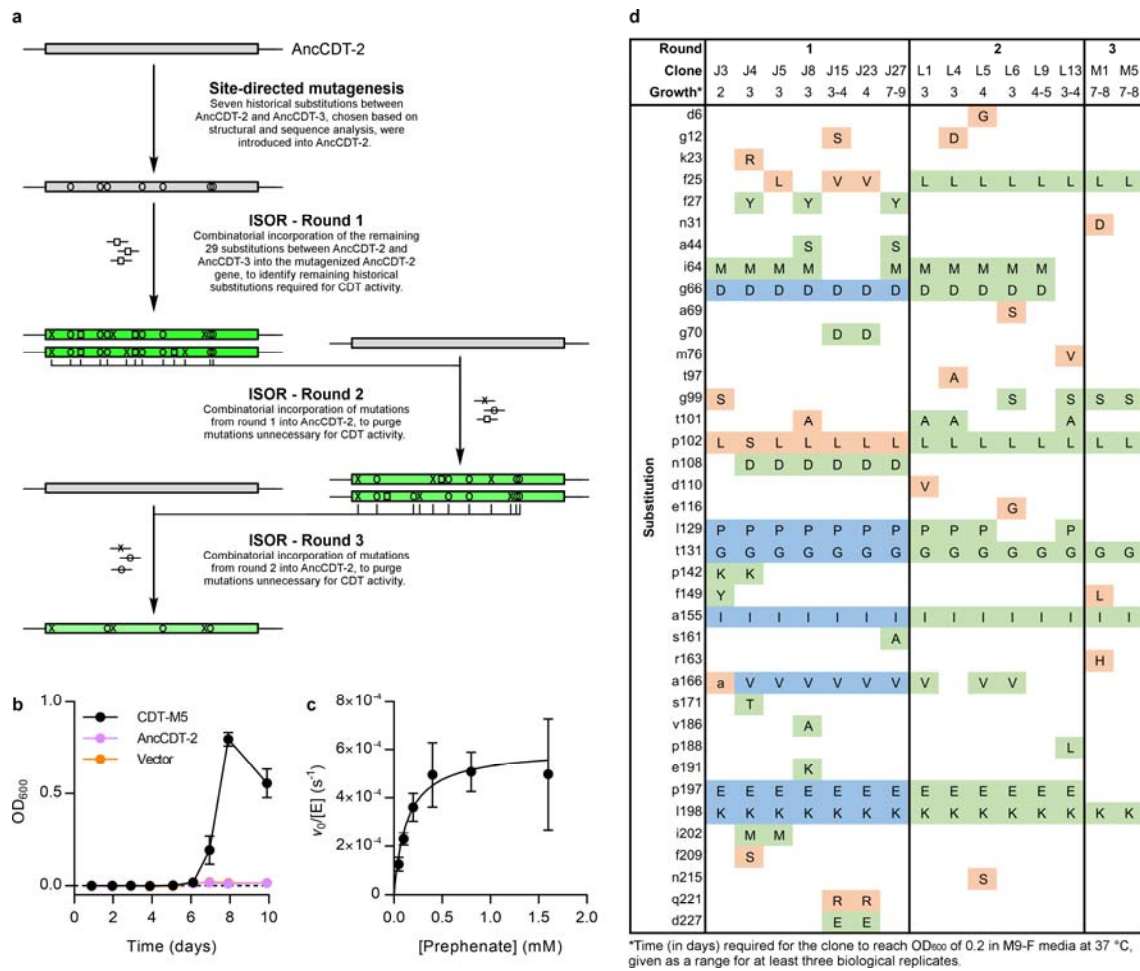

874

875 **Extended Data Figure 8. Directed evolution of AncCDT-2.** **a**, Overview of the strategy  
 876 used for directed evolution of AncCDT-2. **b**, Complementation of auxotrophic *E. coli*  $\Delta$ *pheA*  
 877 cells in selective M9–F media by CDT-M5 (mean  $\pm$  s.e.m., three biological replicates).  
 878 AncCDT-2 and empty vector transformants were used as negative controls. **c**, Michaelis-  
 879 Menten plot for CDT-M5 (mean  $\pm$  s.d. of 3 – 8 technical replicates). **d**, Sequences of  
 880 AncCDT-2 variants with CDT activity, isolated by genetic selection of ISOR libraries.  
 881 Amino acid substitutions in blue originated from the template gene (*via* site-directed  
 882 mutagenesis), substitutions in green were encoded in oligonucleotides, and substitutions in  
 883 orange were acquired randomly.

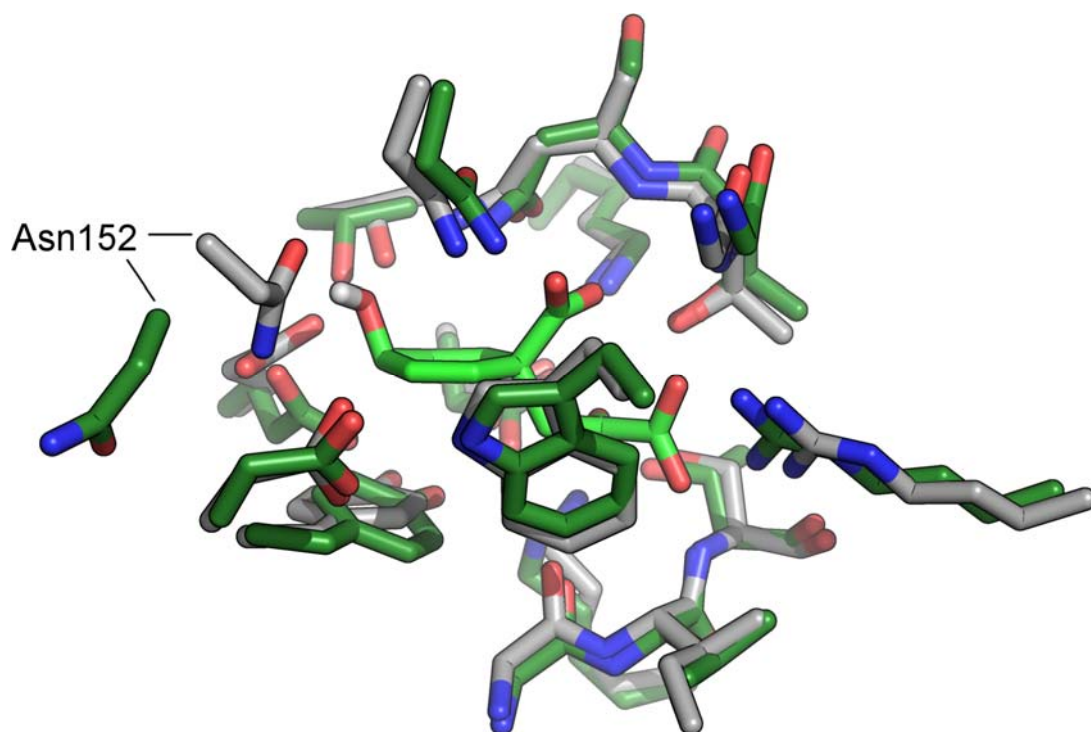

884

885 **Extended Data Figure 9. Active site structures of PaCDT and AncCDT-3(P188L).** The  
886 closed conformation of AncCDT-3(P188L) was modeled by superimposing the two domains  
887 of AncCDT-3(P188L) (dark green) separately on the structure of PaCDT (grey, with docked  
888 prephenate in light green). Excluding Asn152, which is involved in crystal packing in the  
889 AncCDT-3(P188L) structure, the active site structures of the two proteins are virtually  
890 identical, despite the difference in global conformation.

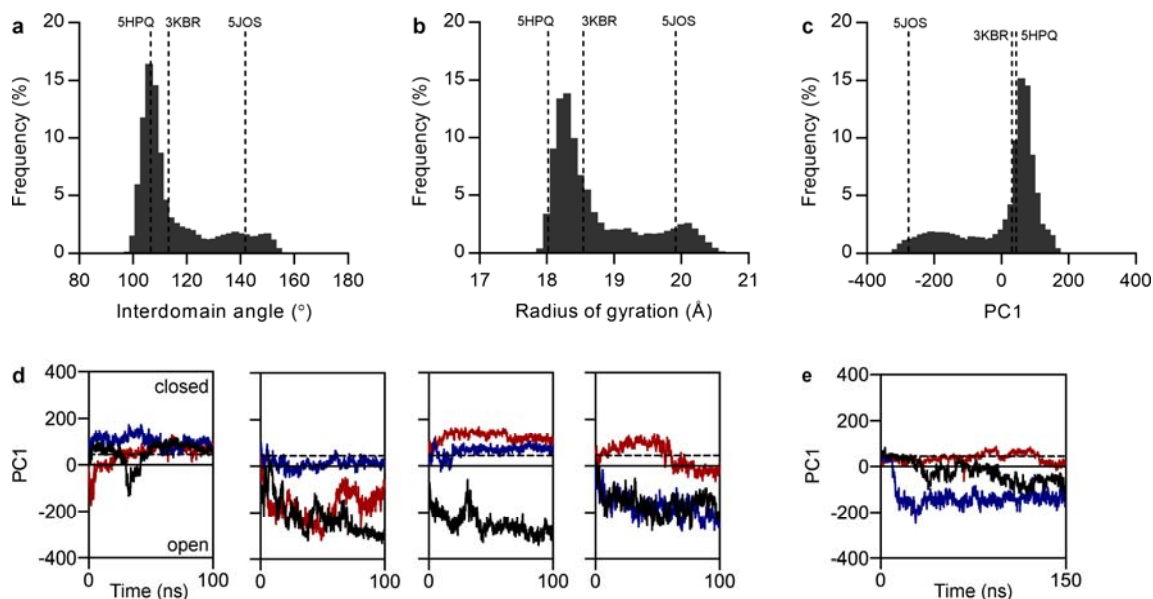

891

892 **Extended Data Figure 10. Molecular dynamics simulations of PaCDT.** a-c, Frequency  
893 histograms of the interdomain angle (a), the radius of gyration (b), and the projection onto  
894 the first principal component (PC1) (c) for individual PaCDT subunits in the eight  
895 simulations using the GROMOS 53a6 force field (1.08  $\mu$ s simulation time). Each quantity  
896 can be used as a descriptor of the conformational change between the open and closed states  
897 of the protein. The corresponding values for the crystal structures of PaCDT (PDB: 5HPQ,  
898 3KBR) and AncCDT-3(P188L) (PDB: 5JOS) are also shown. d-e, Projections of the  
899 trajectories of individual PaCDT subunits onto the PC1 axis. Each color represents a subunit  
900 of the PaCDT homotrimer. The dotted line represents the crystallographic conformation  
901 (5HPQ). (d)  $4 \times 100$  ns simulations initialized from 3KBR using the GROMOS 53a6 force  
902 field. (e)  $1 \times 150$  ns simulation initialized from 5HPQ using the OPLS3 force field.
